# Supplementary material for: A metal catalyst-free and one-pot synthesis of (3,4-dihydro-2H-benzo[b][1,4]oxazin-2-yl)methanol derivatives in water
Source: Royal Society of Chemistry journal article supplement (doi:10.1039/c5ra14478g), 2015-01-01

### Copies of spectra

TDC-008 C126/SNS/030P in DMSO  
NMR-400MHz  
AN.No: ME0414/1083  
Analyst: Haribabu  
Date: 09th April, 2014

NUCLEUS : H1  
FRQ (MHz): 400.22  
EXP : s2pul

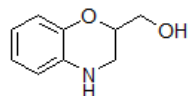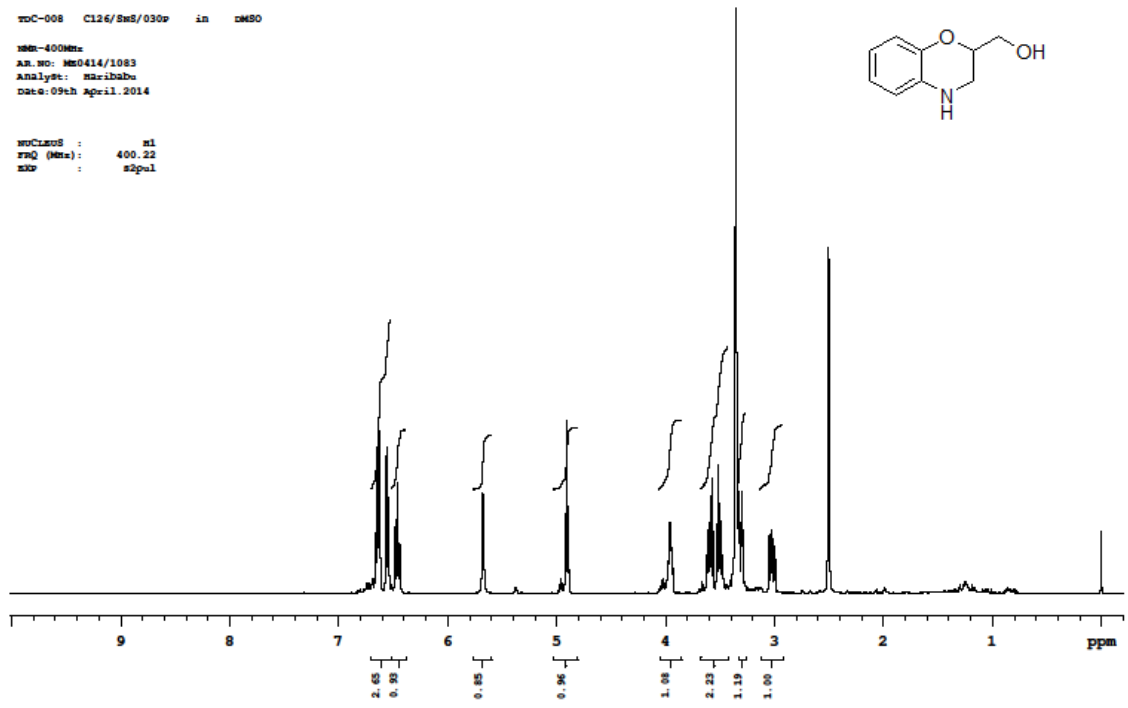

### <sup>1</sup>H NMR spectra in DMSO-d<sub>6</sub>

TDC-008 C126/SNS/030P in DMSO  
D2O Exchange  
NMR-400MHz  
AN.No: ME0414/1352  
Analyst: Haribabu  
Date: 14th April, 2014

NUCLEUS : H1  
FRQ (MHz): 400.22  
EXP : s2pul

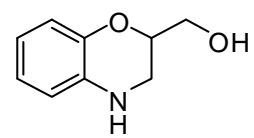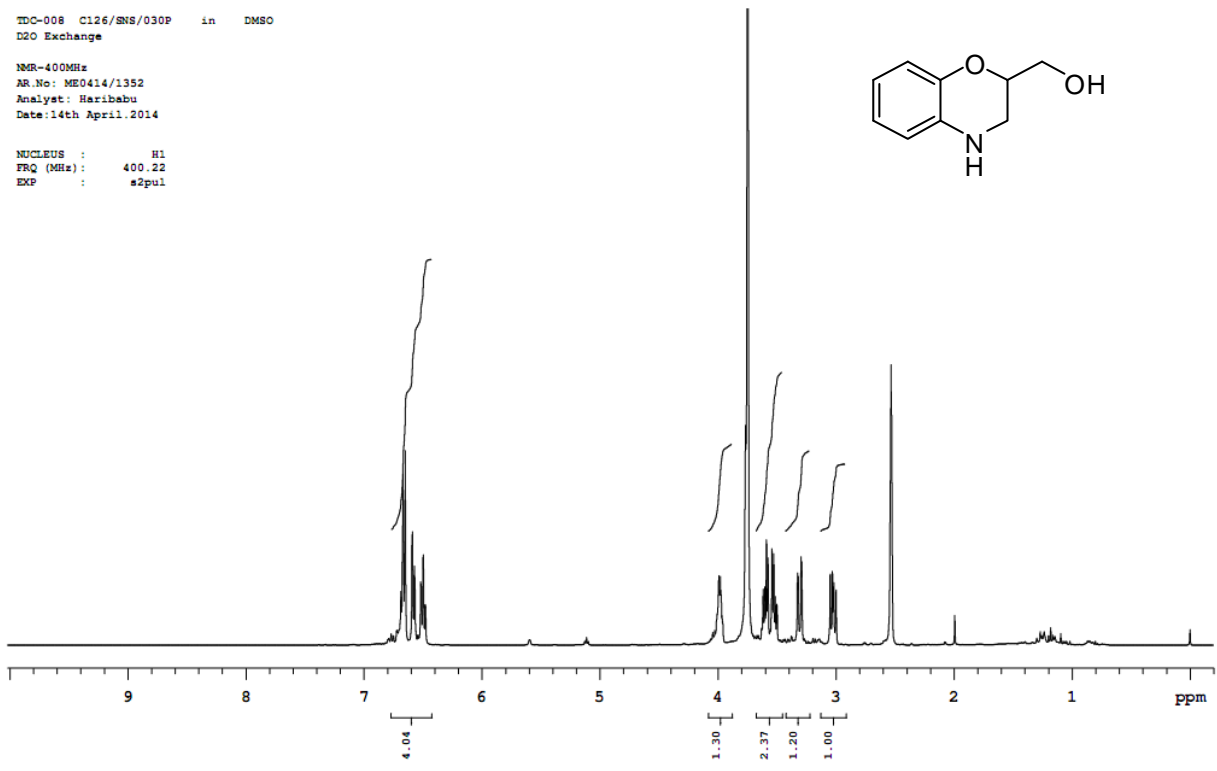

### D<sub>2</sub>O exchange spectra

TDC-008 C126-BNS-030-P in CDCl3

MR=400MHz  
AR.No: MS0414/1561  
Analyt: Genesha  
Date: 14th April, 2014

NUCLEUS : H1  
FREQ (MHz): 400.22  
EXP : zgpg1

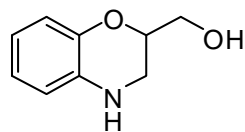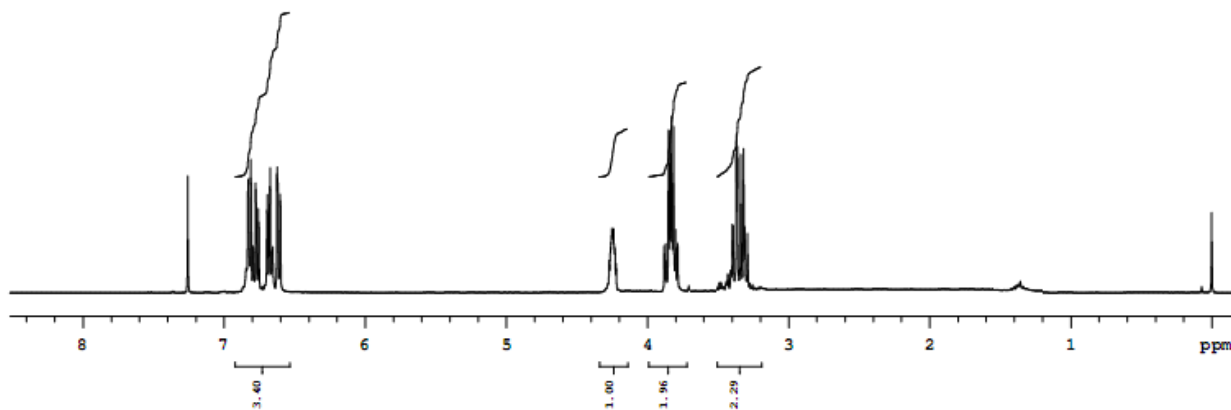

<sup>1</sup>H NMR spectra in CDCl<sub>3</sub>

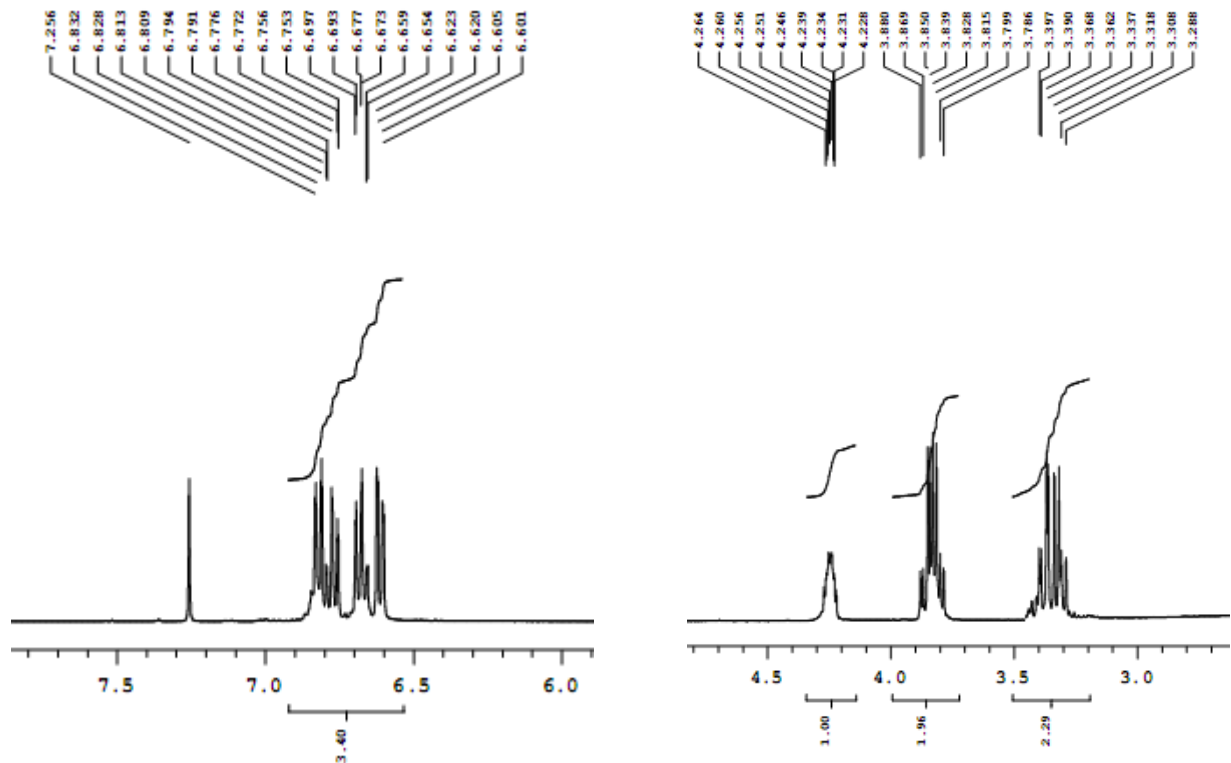

TDC-110-Cl26-C8M3-030

AR.No: M20115/642

Analyst : NARESH B  
Solvent : DMSO  
Date : Jan 12 2015  
NOCLABS : C13  
FPO (MHz): 100.65  
EXP : CARBON

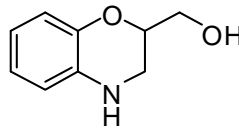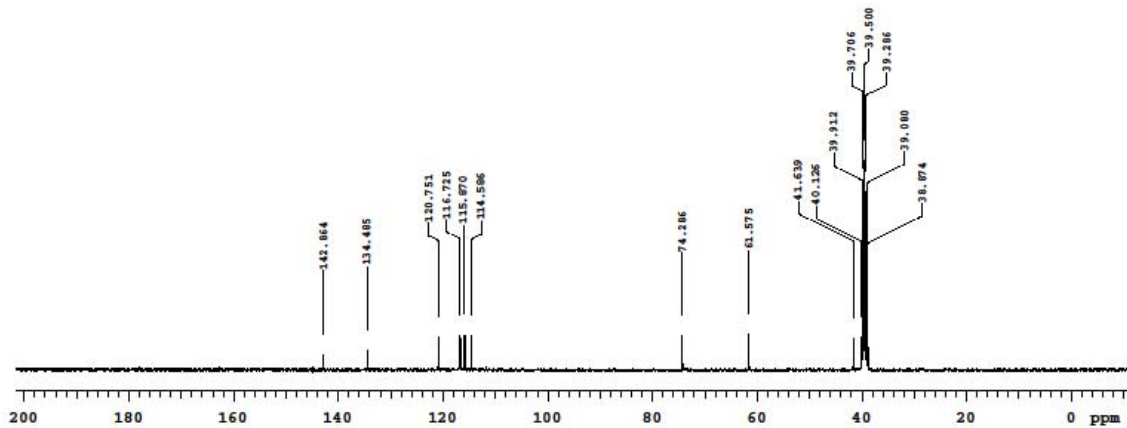

### Elemental Composition Report

#### Single Mass Analysis

Tolerance = 5.0 PPM / DBE: min = -5.0, max = 80.0

Element prediction: Off

Number of isotope peaks used for i-FIT = 2

Monoisotopic Mass, Even Electron Ions

33 formula(e) evaluated with 1 results within limits (up to 5 best isotopic matches for each mass)

Elements Used:

C: 0-20 H: 0-20 N: 0-2 O: 0-2 Cl: 0-1

C126/SNS/030P

140415013 19 (0.593) Cm (19:22-41:44)

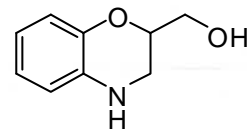

Page 1

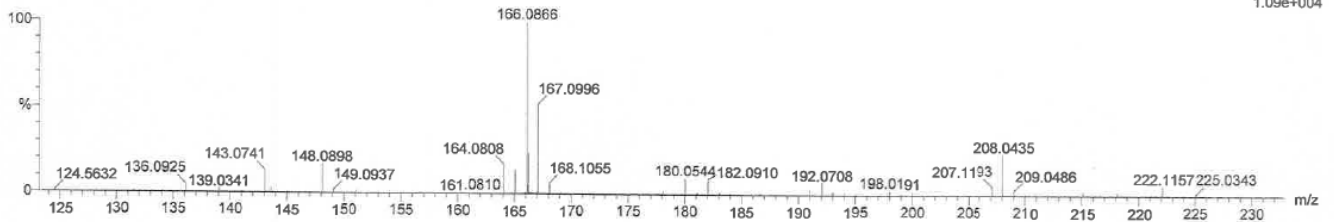

1: TOF MS ES+  
1.09e+004

Minimum: -5.0  
Maximum: 5.0 5.0 80.0

| Mass     | Calc. Mass | mDa  | PPM  | DBE | i-FIT  | Formula     |
|----------|------------|------|------|-----|--------|-------------|
| 166.0866 | 166.0868   | -0.2 | -1.2 | 4.5 | 1820.3 | C9 H12 N O2 |

IND-008 C126/SMS/034 Cr in CDCl<sub>3</sub>  
NMR-400MHz  
AN. NO: MS0414/2423  
ANALYST: Haribabu  
DATE: 23rd April, 2014

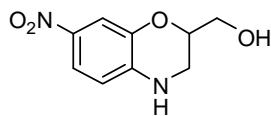

WUCLASS : M1  
FREQ (MHz) : 400.22  
NMR : s2pul

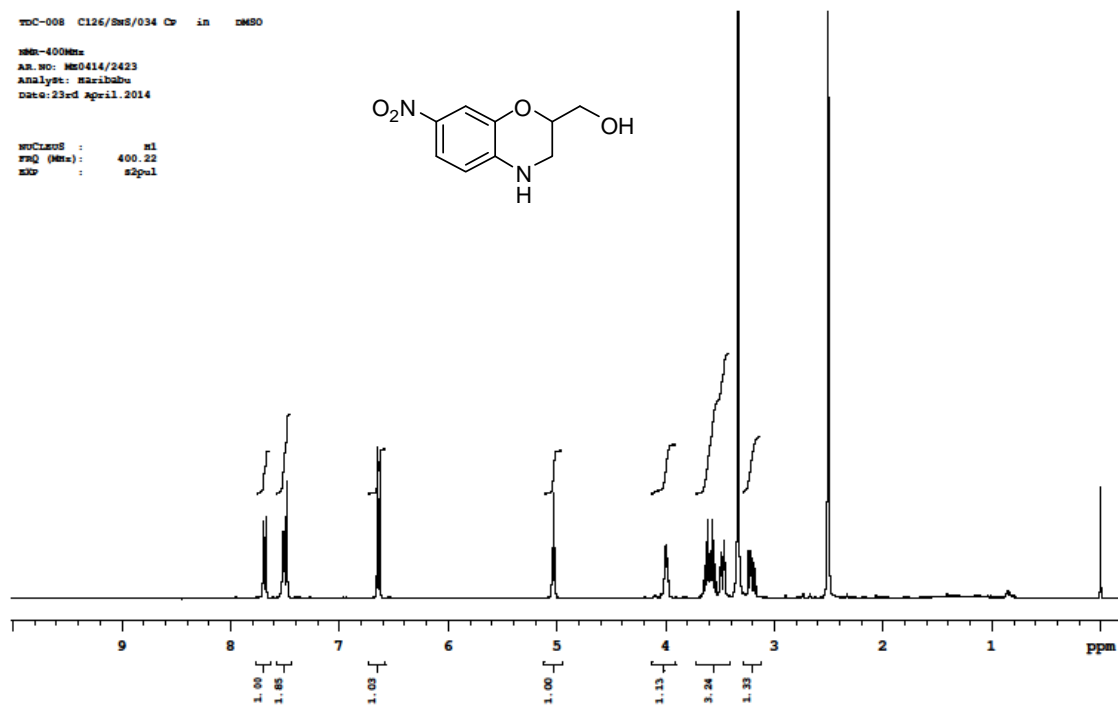

TOC-008 C126-SHS-034-CP in DMSO

HM-400MHz  
Ac. No: MS0414/2795  
Analyst: Ganesh  
Date: 25th April, 2014

PROCLOS : C13  
PFIQ (Hz): 100.65  
SD : s2pol

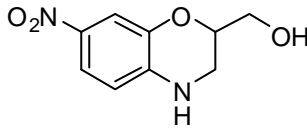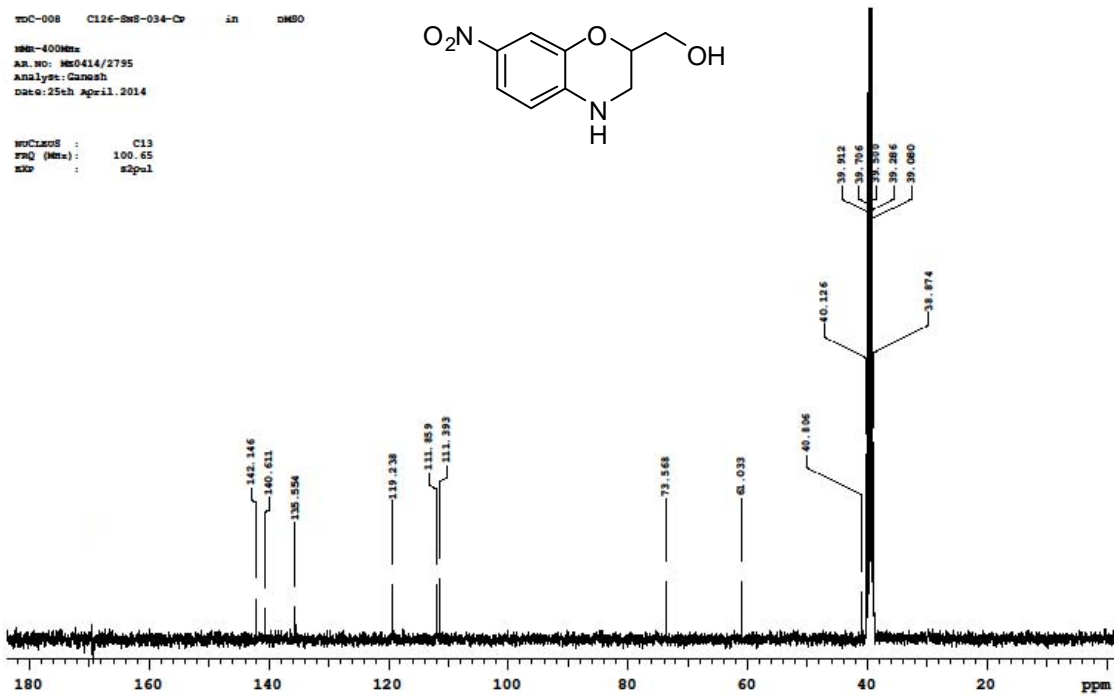

### Elemental Composition Report

#### Single Mass Analysis

Tolerance = 5.0 PPM / DBE: min = -1.5, max = 80.0  
Element prediction: Off  
Number of isotope peaks used for i-FIT = 2

Monoisotopic Mass, Even Electron Ions  
40 formula(e) evaluated with 1 results within limits (up to 5 best isotopic matches for each mass)  
Elements Used:  
C: 0-13 H: 0-14 N: 0-4 O: 0-6  
C126/CSNS3/034-CP  
141230006 35 (0.331) Cm (33:36-86:96)

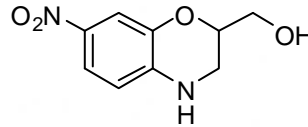

Page 1

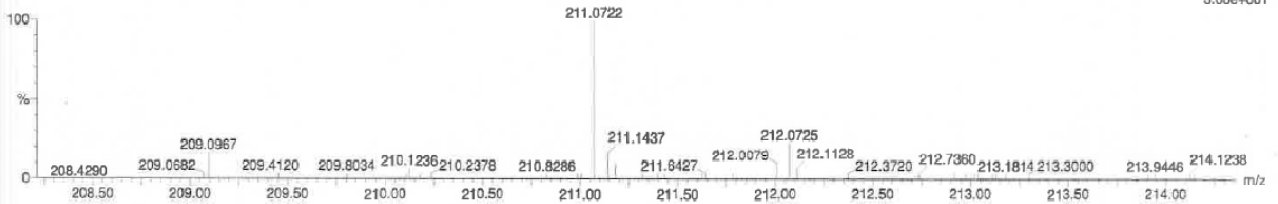

1: TOF MS ES+  
3.08e+001

|          |            |     |     |      |       |              |  |
|----------|------------|-----|-----|------|-------|--------------|--|
| Minimum: |            |     |     |      |       |              |  |
| Maximum: |            | 5.0 | 5.0 | -1.5 | 80.0  |              |  |
| Mass     | Calc. Mass | mDa | PPM | DBE  | i-FIT | Formula      |  |
| 211.0722 | 211.0719   | 0.3 | 1.4 | 5.5  | 0.9   | C9 H11 N2 O4 |  |

ARDL08C1 RNR202  
R. Nagarajan  
20/12/2014

TOC-008 C126/SnS/038-p in DMSO

RMN-400MHz  
AN. NO: MM0514/321  
Analyte: Maribabu  
Date: 06th May, 2014

NOCLMUS : n1  
PFG (Hz): 400.22  
SFO : s2p1

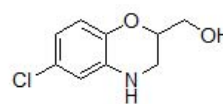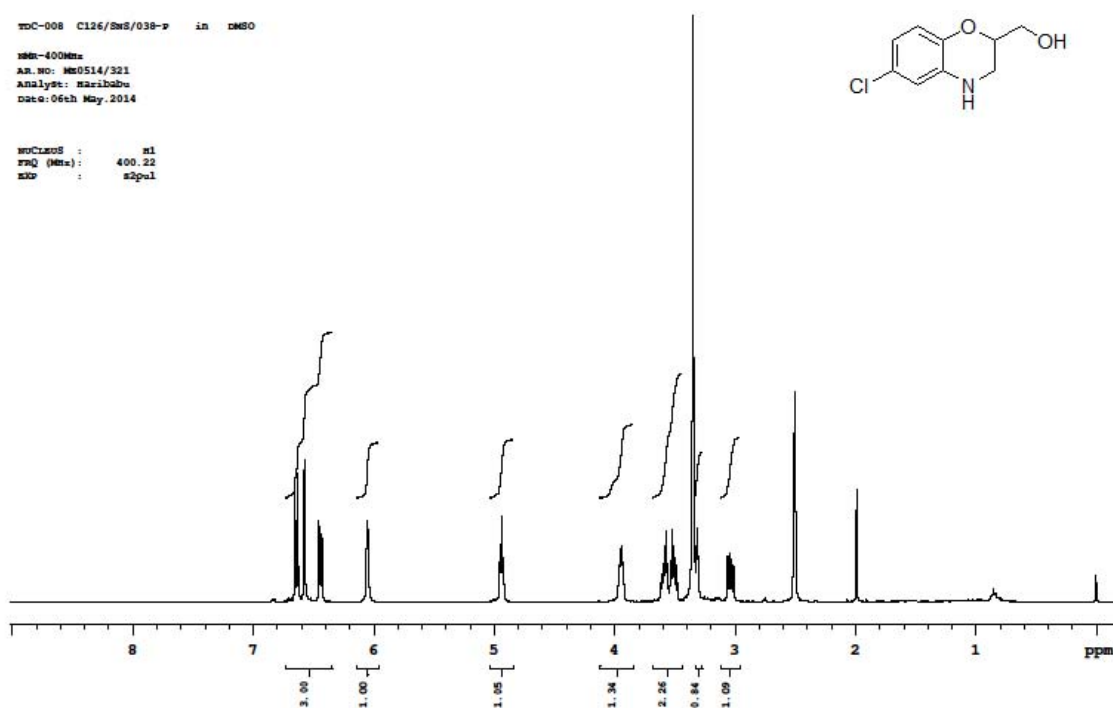

TOC-008 C126-SNS-038-P in DMSO

IRN-400MHz  
 Ac. No: MS0514/1000  
 Analyst: Haribabu  
 Date: 12th May, 2014

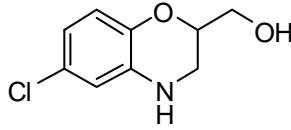

NOCLAS : C13  
 FREQ (MHz): 100.65  
 XDP : s2pol

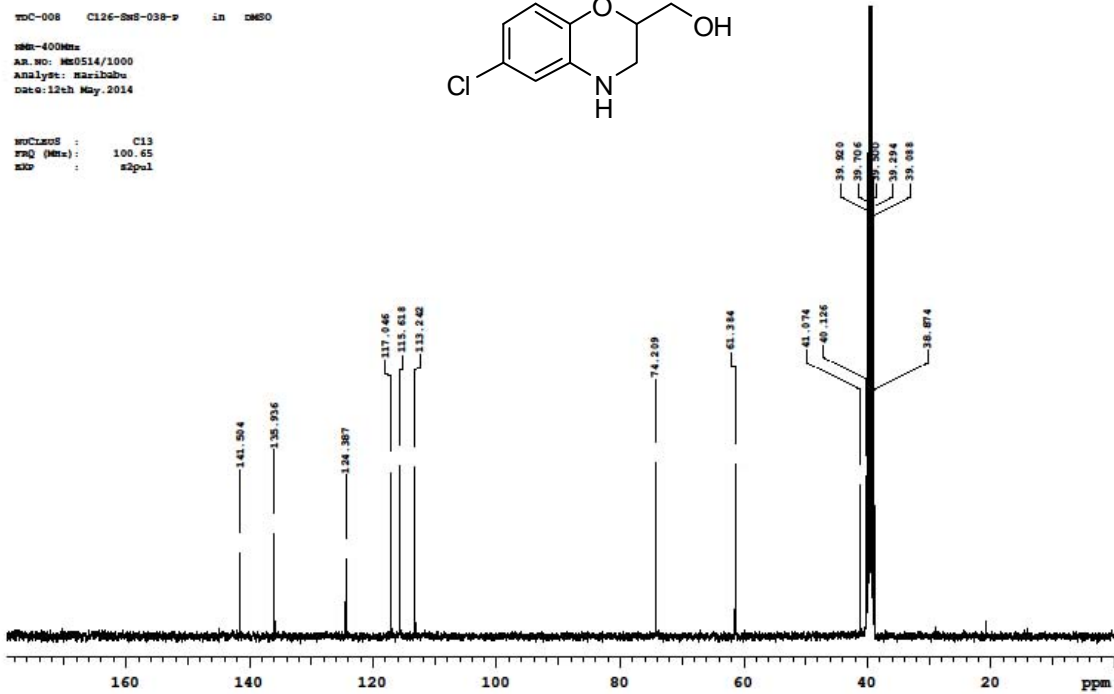

Elemental Composition Report

Single Mass Analysis

Tolerance = 8.0 PPM / DBE: min = -5.0, max = 80.0  
 Element prediction: Off  
 Number of isotope peaks used for i-FIT = 3

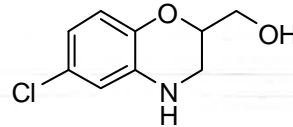

Monoisotopic Mass, Even Electron Ions  
 21 formula(e) evaluated with 1 results within limits (up to 5 best isotopic matches for each mass)  
 Elements Used:  
 C: 0-14 H: 0-14 N: 0-2 O: 0-2 Cl: 0-1  
 C126/SNS/038 P  
 140514002 16 (0.294) Cm (14:16-27)

1: TOF MS ES+  
 1.34e+003

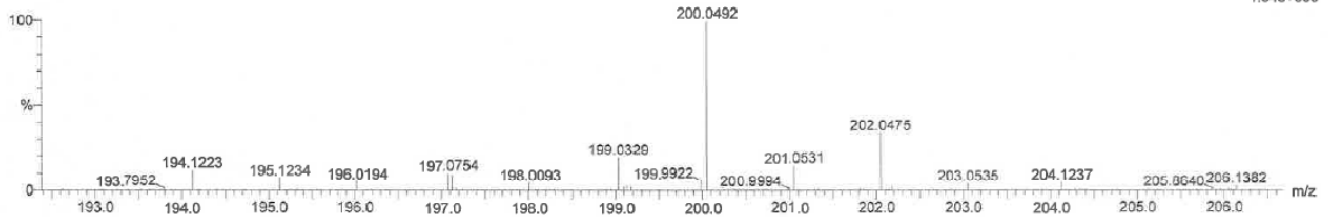

| Mass     | Calc. Mass | mDa | PPM | DBE | i-FIT | Formula        |
|----------|------------|-----|-----|-----|-------|----------------|
| 200.0492 | 200.0478   | 1.4 | 7.0 | 4.5 | 6.6   | C9 H11 N O2 Cl |

TDC-110 C126/CSMS3/059

AR.No: MH0115/630

Analyst : Mallikarjun  
Solvent : DMSO  
Date : Jan 9 2015  
NUCLEUS : H1  
FREQ (MHz): 400.22  
EXP : PROTON

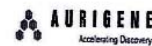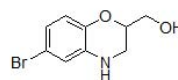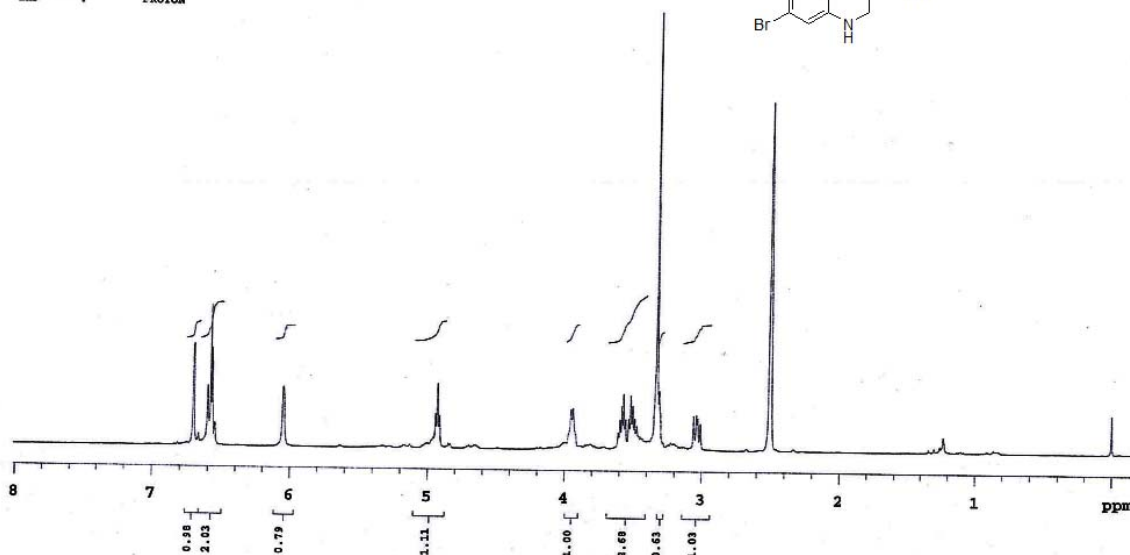

TDC-110 C126/CSMS3/059

AR.No: MH0115/786

Analyst : HARSH B  
Solvent : DMSO  
Date : Jan 13 2015  
NUCLEUS : C13  
FREQ (MHz): 100.65  
EXP : CARBON

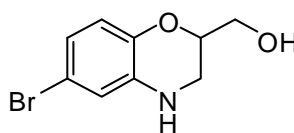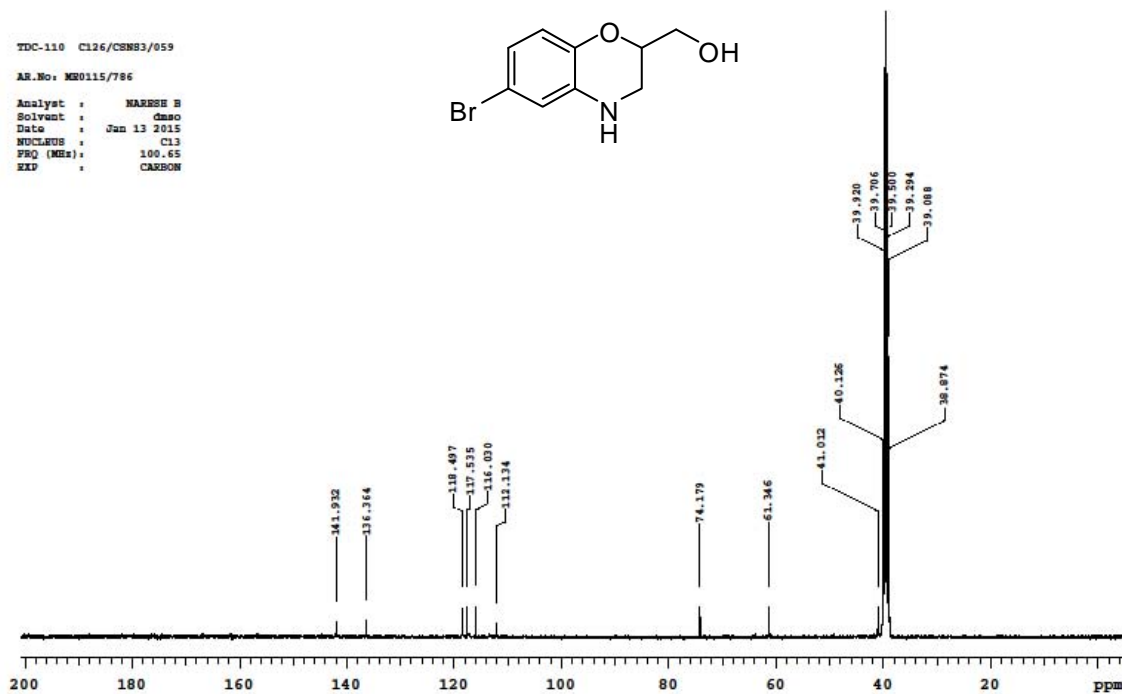



**Elemental Composition Report**

**Single Mass Analysis**

Tolerance = 5.0 PPM / DBE: min = -1.5, max = 80.0  
 Element prediction: Off  
 Number of isotope peaks used for i-FIT = 2

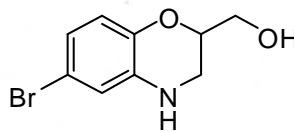

Monoisotopic Mass, Even Electron Ions  
 111 formula(e) evaluated with 1 results within limits (up to 5 best isotopic matches for each mass)  
 Elements Used:

C: 0-14 H: 0-15 N: 0-4 O: 0-6 Br: 0-3

C126/CSNS3/059 P  
 141230009 23 (0.219) Cm (23:27-108:113)

1: TOF MS ES+  
 1.32e+003

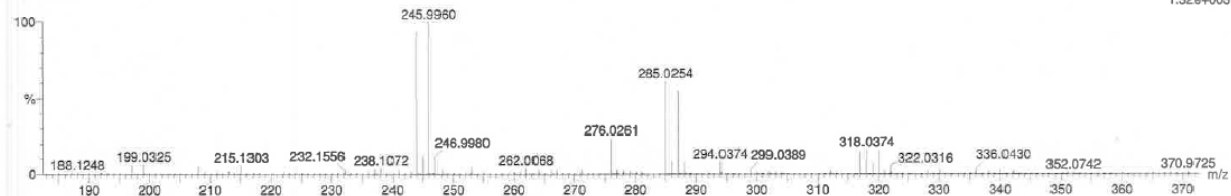

Minimum: -1.5  
 Maximum: 5.0 5.0 80.0

| Mass     | Calc. Mass | mDa | PPM | DBE | i-FIT | Formula        |
|----------|------------|-----|-----|-----|-------|----------------|
| 243.9978 | 243.9973   | 0.5 | 2.0 | 4.5 | 3.0   | C9 H11 N O2 Br |

*Andreas RNR/202  
 R-Nager  
 30/11/14*

msC-110 C126/CSNS3/065 research work

sr. no: MS1214/2856

Analyst : NARSEN B  
 Solvent : DMSO  
 Date : Dec 31 2014  
 mCubes : M1  
 FWHM (MHz): 400.22  
 EXP : PR0708

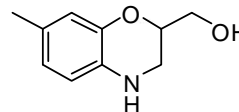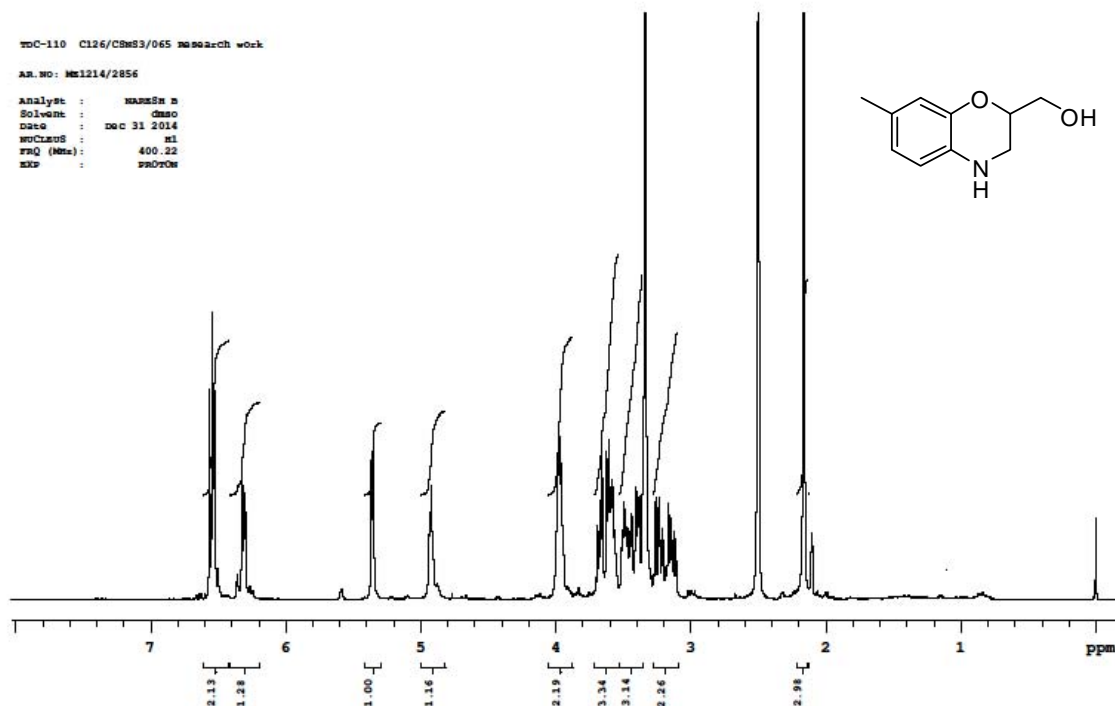

TDC-110 C126/CSNS3/065

AR.No: M20115/563

Analyst : NARESH B  
Solvent : DMSO  
Date : Jan 9 2015  
NOCLASIS : C13  
FREQ (MHz): 100.65  
EXP : CARBON

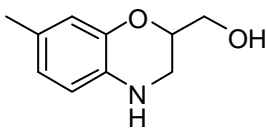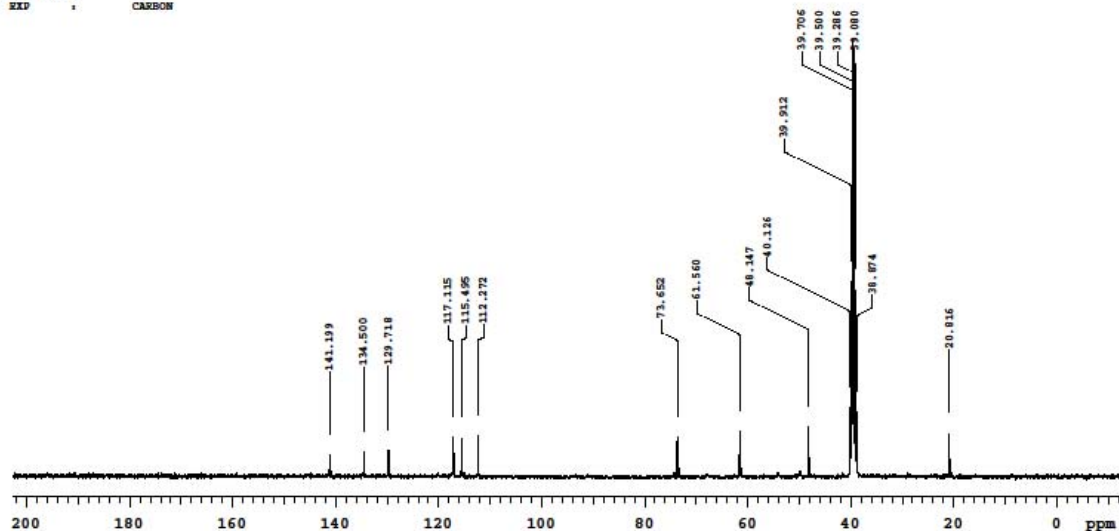

### Elemental Composition Report

#### Single Mass Analysis

Tolerance = 5.0 PPM / DBE: min = -1.5, max = 80.0  
Element prediction: Off  
Number of isotope peaks used for i-FIT = 4

Monoisotopic Mass, Even Electron Ions  
53 formula(e) evaluated with 1 results within limits (up to 4 best isotopic matches for each mass)  
Elements Used:  
C: 0-15 H: 0-17 N: 0-4 O: 0-6  
C126/CSNS3/065  
150122016 0 (0.171) Cm (5:10-49)

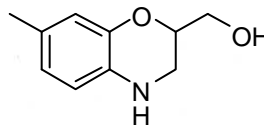

Page 1

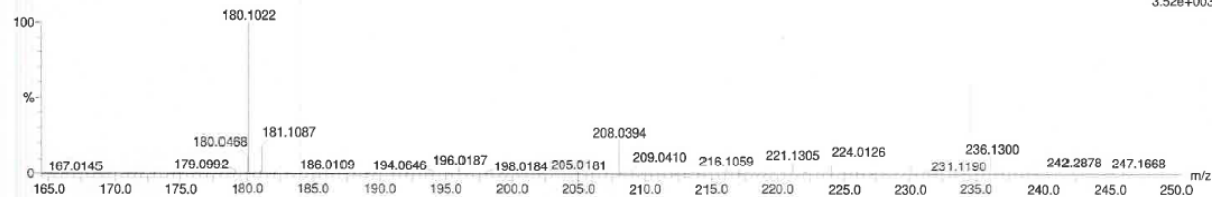

| Mass     | Calc. Mass | mDa  | PPM  | DBE | i-FIT | Formula      |
|----------|------------|------|------|-----|-------|--------------|
| 180.1022 | 180.1025   | -0.3 | -1.7 | 4.5 | 40.6  | C10 H14 N O2 |

ARDISOOI/KNR/02  
R. Nagarajan  
23/01/2015  
*[Signature]*  
23/01/2015

1: TOF MS ES+  
3.52e+003

TOC-008 C126/CSMS3/055 in DMSO

MR-400ms  
AN. NO: MS1014/2248  
ANALYST: Maribabo  
DATE: 29th Oct. 2014

NO. OF SCANS : 1  
PULPROG : zgpg30  
FREQ (MHz) : 400.22  
EXP : s2ps1

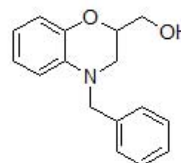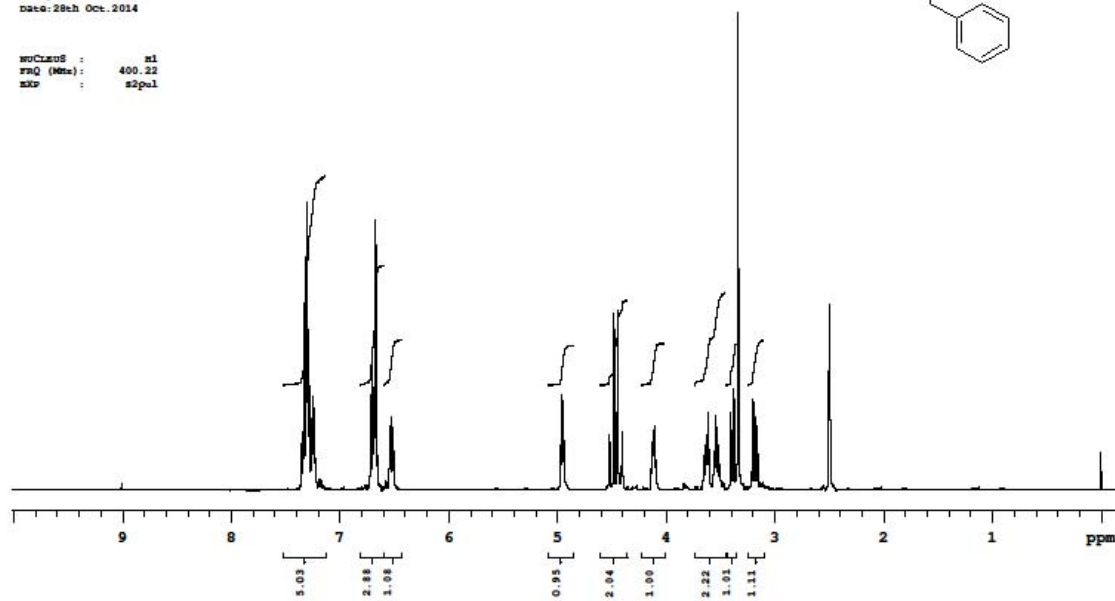

TOC-008 C126/CSNS3/055 in DMSO

MSM-400MHz  
AN. NO: MS1014/2790  
Analyst: Haribabu  
Date: 31st Oct. 2014

NOCLASUS : C13  
FREQ (MHz): 100.65  
XDP : s2p.u1

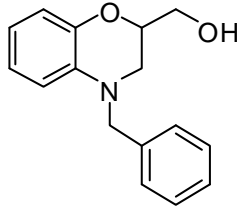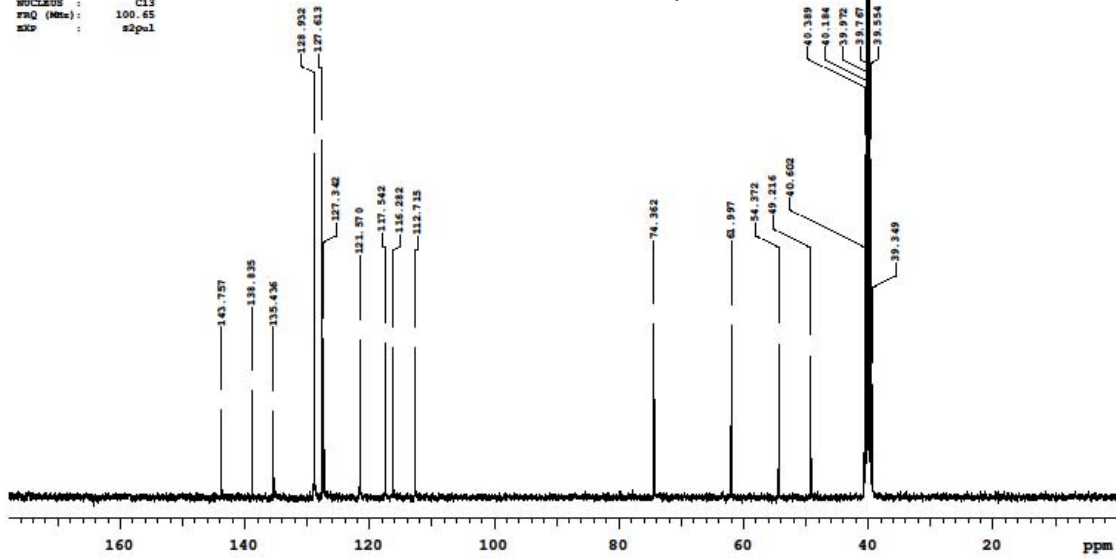

### Elemental Composition Report

#### Single Mass Analysis

Tolerance = 5.0 PPM / DBE: min = -1.5, max = 80.0

Element prediction: Off

Number of isotope peaks used for i-FIT = 2

Monoisotopic Mass, Even Electron Ions

98 formula(e) evaluated with 1 results within limits (up to 5 best isotopic matches for each mass)

Elements Used:

C: 0-26 H: 0-25 N: 0-4 O: 0-8

C126/CSNS3/055-CP

141230011 52 (0.491) Cm (52:55-125:132)

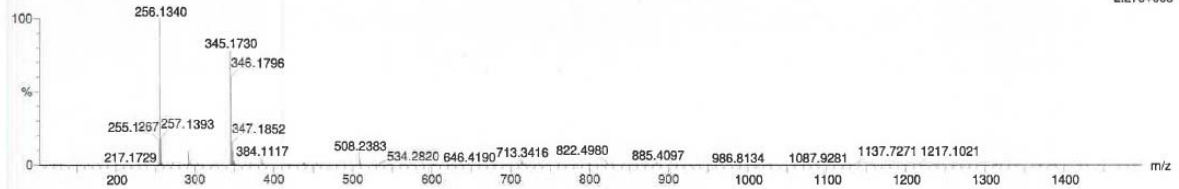

Minimum:

Maximum:

| Mass     | Calc. Mass | mDa | PPM | DBE | i-FIT | Formula      |
|----------|------------|-----|-----|-----|-------|--------------|
| 256.1340 | 256.1338   | 0.2 | 0.8 | 8.5 | 0.1   | C16 H18 N O2 |

ADP/AS/RNR/202  
R. Nagarajan  
30/12/2014

TDC-008 C126/CEN3/060P in DMSO

NMR-400MHz  
AR.No: MR1014/2214  
Analyst: Haribabu  
Date: 28th Oct. 2014

NUCLEUS : E1  
FRQ (MHz): 400.22  
EXP : s2pul

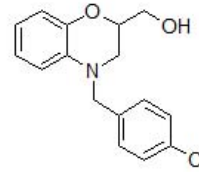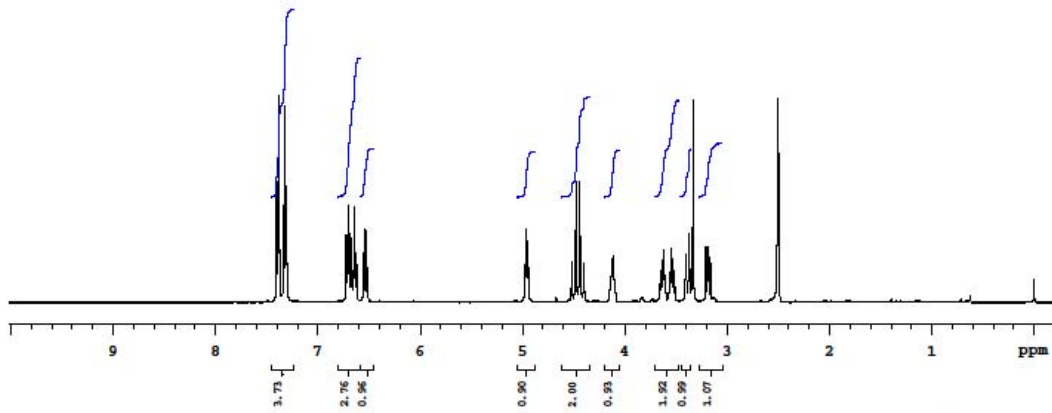

WC-008 C126/CSNS3/060 in DMSO

MS-400MHz  
AN. NO: MS1014/2788  
Analyst: Karibabu  
Date: 31st Oct. 2014

NOCLUS : C13  
PULP (Hz): 100.625  
SFO : s2p=1

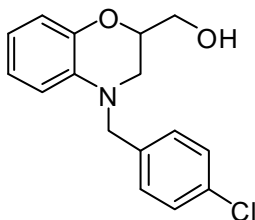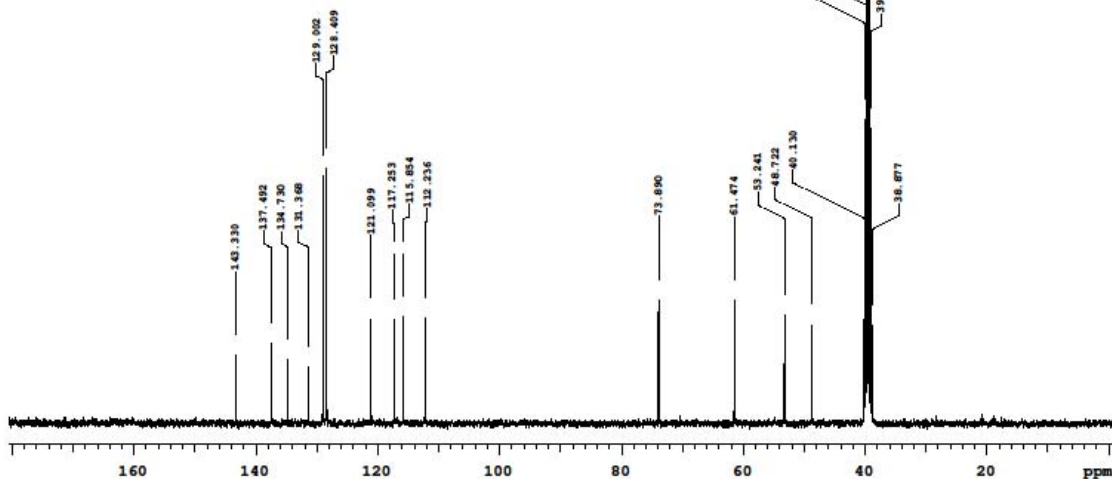

### Elemental Composition Report

#### Single Mass Analysis

Tolerance = 5.0 PPM / DBE: min = -1.5, max = 80.0

Element prediction: Off

Number of isotope peaks used for i-FIT = 2

Monoisotopic Mass, Even Electron Ions

294 formula(a) evaluated with 1 results within limits (up to 5 best isotopic matches for each mass)

Elements Used:

C: 0-26 H: 0-25 N: 0-4 O: 0-3 Cl: 0-2

C126/CSNS3/060-CP

14123001232 (0.302) Cm (32:35-148:154)

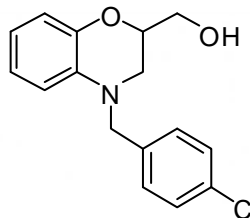

Page 1

I: TOF MS ES+  
2.21e+003

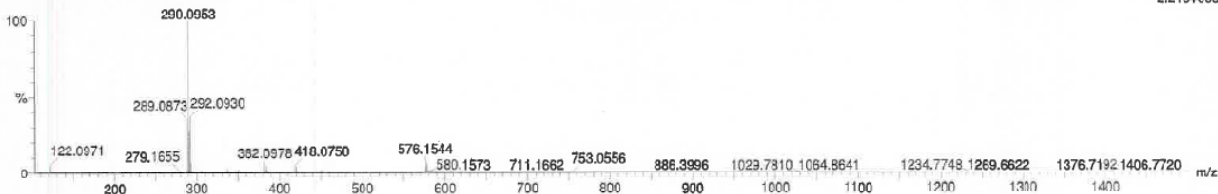

Minimum:

Maximum:

| Mass     | Calc. Mass | mDa | PPM | DBE | i-FIT | Formula         |
|----------|------------|-----|-----|-----|-------|-----------------|
| 290.0953 | 290.0948   | 0.5 | 1.7 | 8.5 | 33.2  | C16 H17 N O2 Cl |

ADDRESS KARIBABU  
R. Nagaraj  
30/12/2014

MO-C-008 C126/CSMS3/061 in DMSO

MSM-400MHz  
AN. NO: MM1114/1123  
ANALYST: Mallikarjun  
DATE: 12th Nov. 2014

NUCLEUS : <sup>1</sup>H  
PULP (MHz): 400.22  
SOLV : DMSO

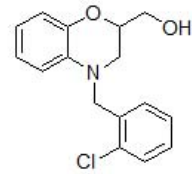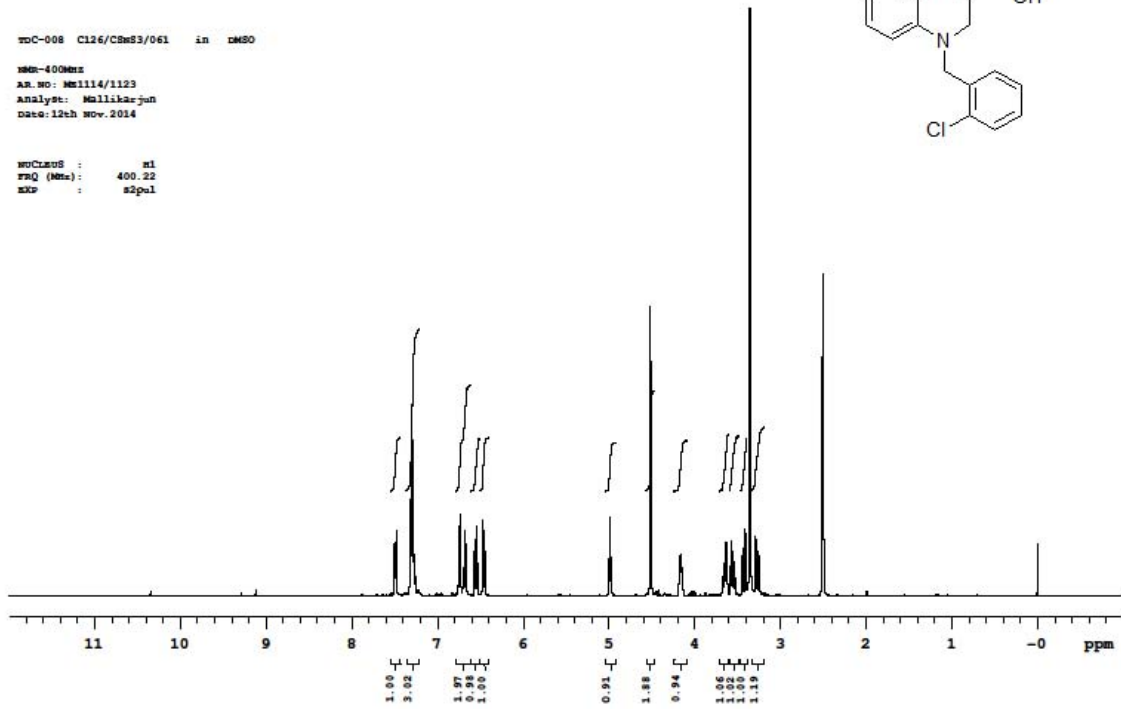

TOC-008 C126/CSMS3/061 in DMSO  
 13C NMR  
 MSN-400MHz  
 AR. NO: MS1114/1461  
 Analyst: Mallikarjun  
 Date: 14th Nov. 2014  
 NOCLXUS : C13  
 FREQ (MHz): 100.65  
 XPR : s2pol

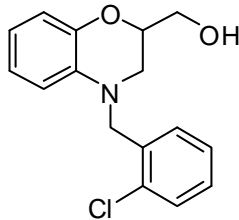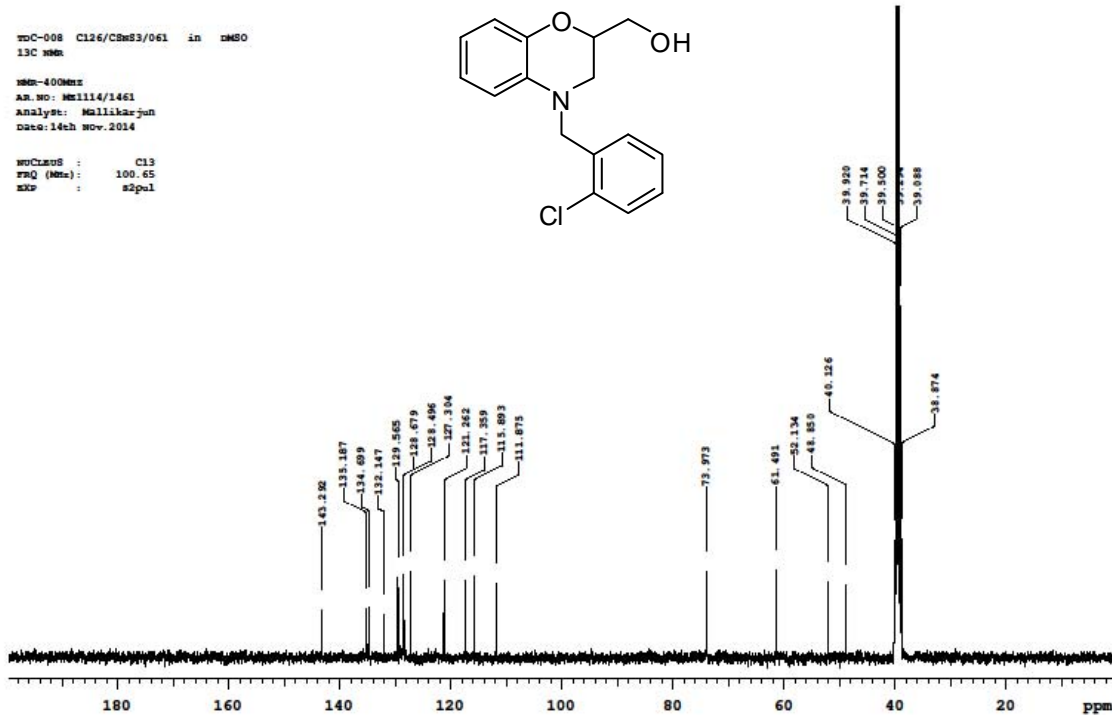

**Elemental Composition Report**

**Single Mass Analysis**

Tolerance = 5.0 PPM / DBE: min = -1.5, max = 80.0  
 Element prediction: Off  
 Number of isotope peaks used for i-FIT = 2

Monoisotopic Mass, Even Electron Ions  
 247 formula(e) evaluated with 1 results within limits (up to 5 best isotopic matches for each mass)  
 Elements Used:  
 C: 0-20 H: 0-20 N: 0-4 O: 0-6 Cl: 0-3  
 C126/CSMS3/061 P  
 141230007 24 (0.226) Cm (21:24-160:164)

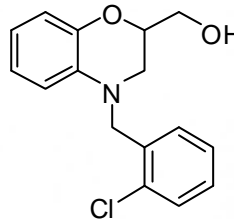

Page 1

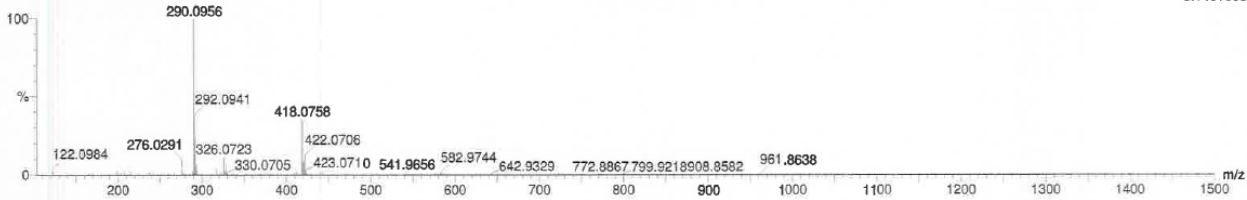

1: TOF MS ES+  
3.14e+003

| Mass     | Calc. Mass | mDa | PPM | DBE | i-FIT | Formula         |
|----------|------------|-----|-----|-----|-------|-----------------|
| 290.0956 | 290.0948   | 0.8 | 2.8 | 8.5 | 7.6   | C16 H17 N O2 Cl |

AND KBC/RNR/202  
 R. Nagaraja  
 30/11/2014



MO-C-008 C126/CSMS3/062 in DMSO

MSM-400MHz  
AN. NO: MM1114/168  
ANALYST: Haribabu  
DATE: 04th Nov. 2014

NUCLEUS : <sup>1</sup>H  
PFG (MHz): 400.22  
XPR : s2p1

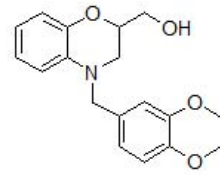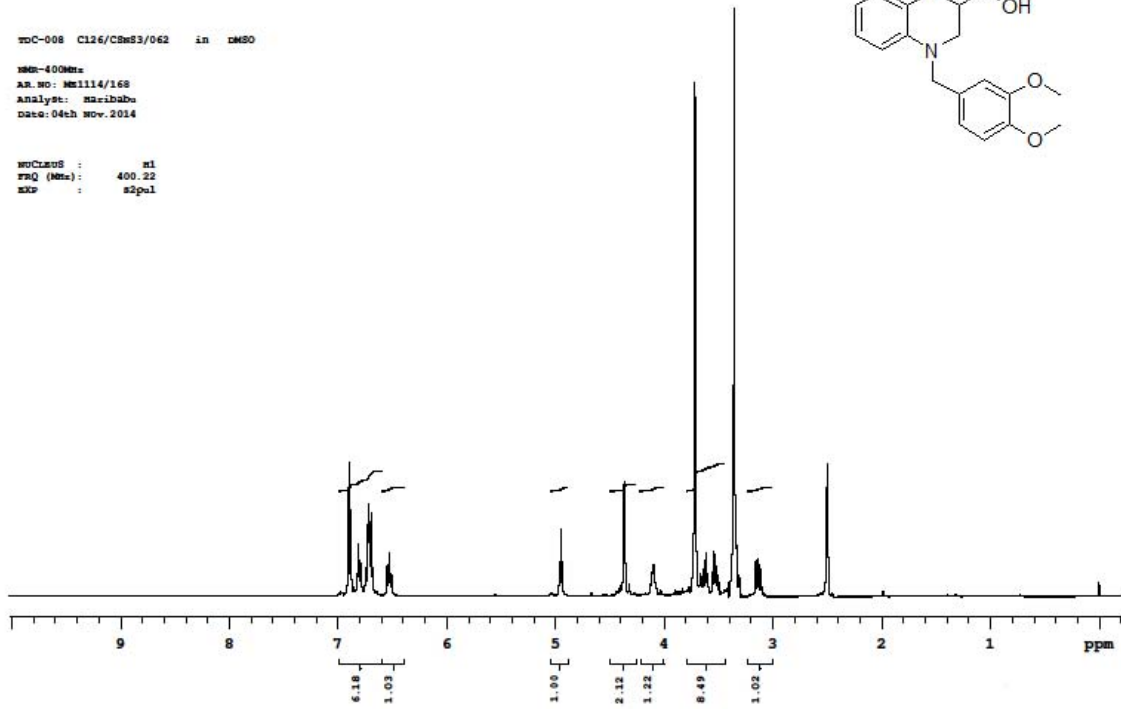

TOC-008 C126/CSMS3/062 in DMSO  
13C NMR

IR-4000Hz  
AR. NO: M1114/1132  
Analyst: Mallikarjun  
Date: 12th Nov. 2014

WUCLEUS : C13  
PFG (kHz): 100.65  
XPR :

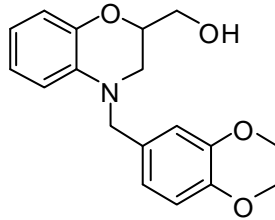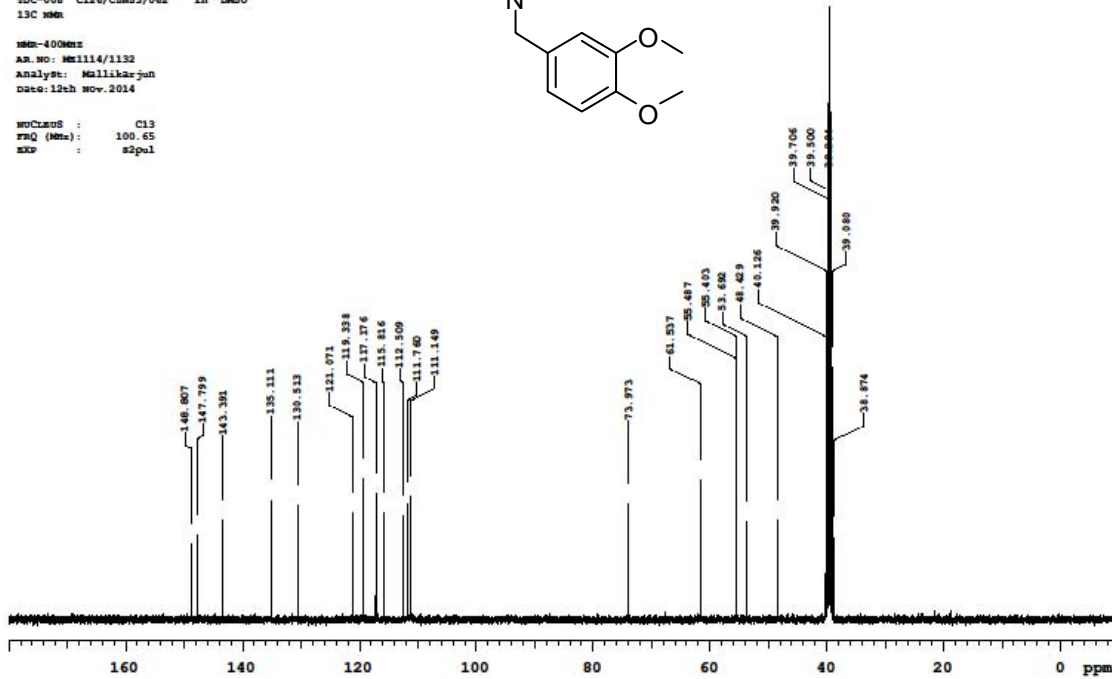

Elemental Composition Report

Single Mass Analysis

Tolerance = 5.0 PPM / DBE: min = -1.5, max = 80.0  
Element prediction: Off  
Number of isotope peaks used for i-FIT = 2

Monoisotopic Mass, Even Electron Ions  
99 formula(e) evaluated with 1 results within limits (up to 5 best isotopic matches for each mass)  
Elements Used:  
C: 0-26 H: 0-25 N: 0-4 O: 0-8  
C126/CSMS3/062-P  
141230010 51 (0.484) Cm (50:56-133:137)

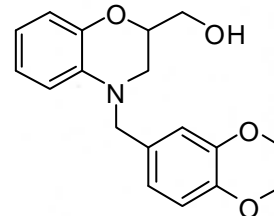

1: TOF MS ES+  
2.91e+003

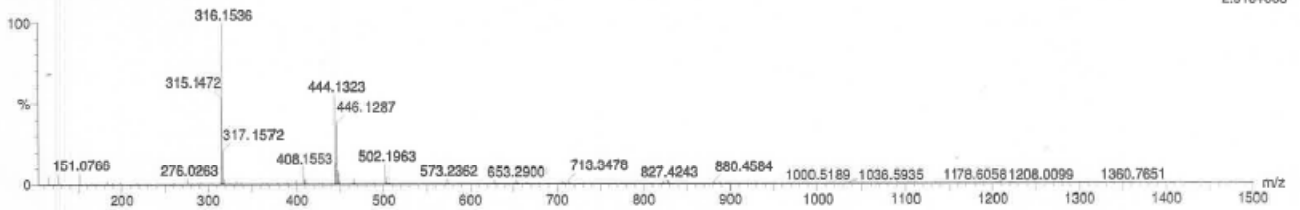

| Mass     | Calc. Mass | mDa  | PPM  | DBE | i-FIT | Formula      |
|----------|------------|------|------|-----|-------|--------------|
| 316.1536 | 316.1549   | -1.3 | -4.1 | 8.5 | 0.3   | C18 H22 N O4 |

ARUNESH RNR/10.02  
R. Nagarajan  
30/11/2014

TDC-008 C126/C8883/056 in DMSO

NMR-400MHz  
AR.No: MR1014/2213  
Analyst: Haribabu  
Date: 28th Oct. 2014

NUCLEUS : E1  
FRQ (MHz): 400.22  
EXP : s2pul

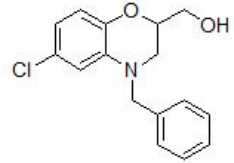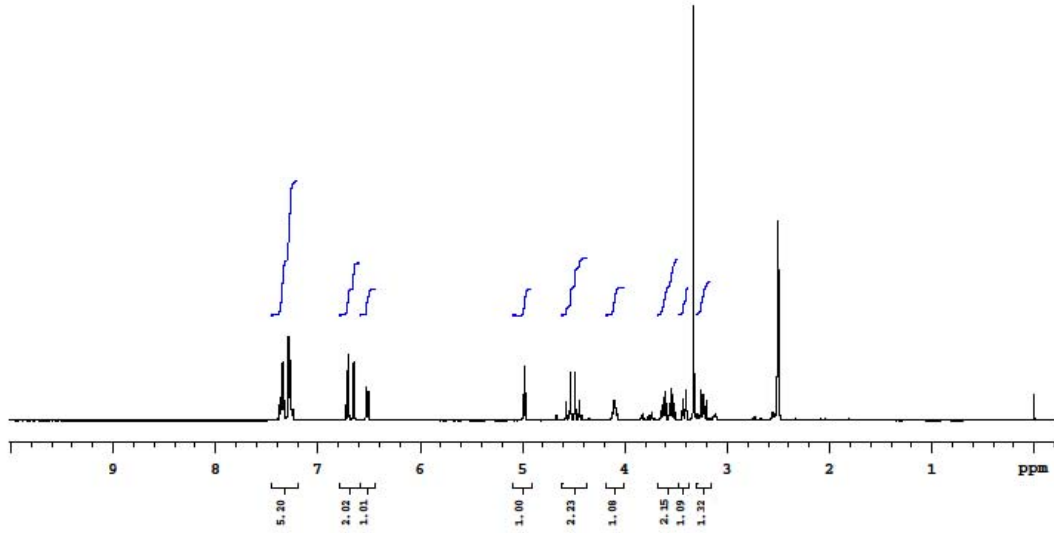

WOC-008 C126/CSMS3/056 in DMSO  
13C NMR

MR=400MHz  
AN. NO: M21114/277  
ANALYST: Haridaba  
Date: 04th Nov. 2014

NOCLBUS : C13  
PULP (MHz): 100.625  
SFO : s2pul

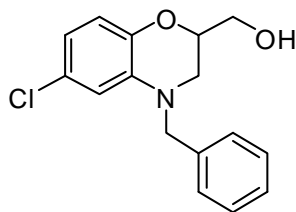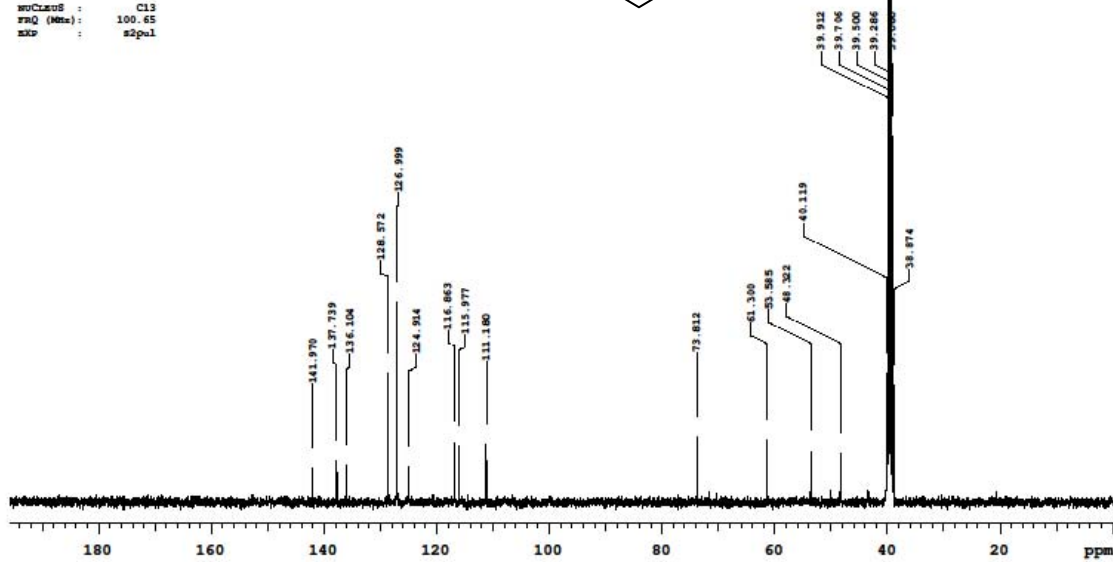

Elemental Composition Report

Single Mass Analysis

Tolerance = 5.0 PPM / DBE: min = -1.5, max = 80.0

Element prediction: Off

Number of isotope peaks used for i-FIT = 2

Monoisotopic Mass, Even Electron Ions

247 formula(e) evaluated with 1 results within limits (up to 5 best isotopic matches for each mass)

Elements Used:

C: 0-20 H: 0-20 N: 0-4 O: 0-6 Cl: 0-3

C126/CSNS3/056 CP

14123000855 (0.520) Cm (54:56-119:124)

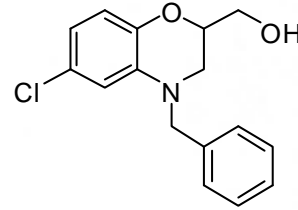

1: TOF MS ES+  
1.55e+003

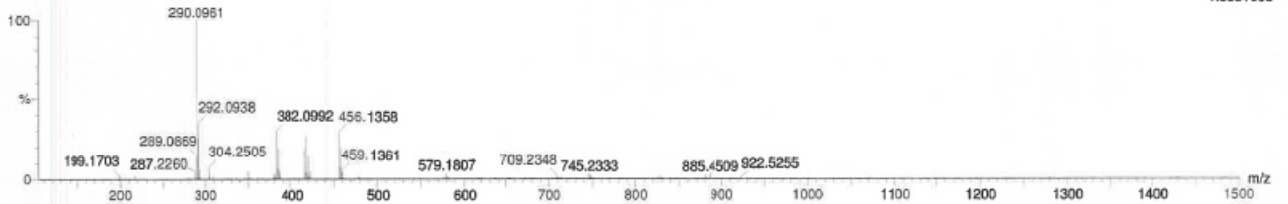

| Minimum: |            |     |     |      |       |                 |
|----------|------------|-----|-----|------|-------|-----------------|
| Maximum: |            | 5.0 | 5.0 | -1.5 |       |                 |
| Mass     | Calc. Mass | mDa | PPM | DBE  | i-FIT | Formula         |
| 290.0961 | 290.0948   | 1.3 | 4.5 | 8.5  | 11.8  | C16 H17 N O2 Cl |

ANDIA 06/12/2012  
R. Nagarajan  
30/12/2014

TDC-110-Cl26-C8M93-065B

AR.No: M20115/797

Analyst : NARESH B  
Solvent : DMSO  
Date : Jan 13 2015  
NUCLEUS : <sup>1</sup>H  
FREQ (MHz): 400.22  
EXP : PROTON

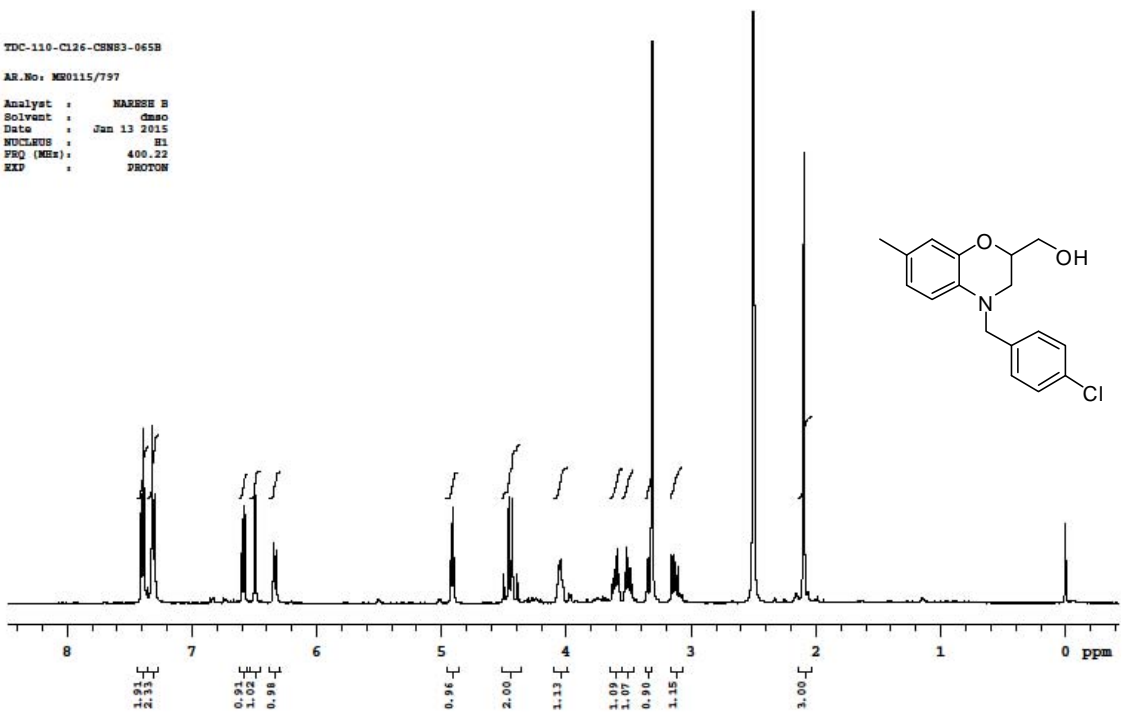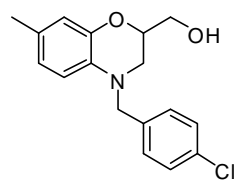

TDC-110-Cl26-C8NS3-065B

AR.No: M20115/1029

Analyst : NARESH B  
Solvent : dmso  
Date : Jan 14 2015  
Nucleus : C13  
FREQ (MHz): 100.65  
EXP : CARBON

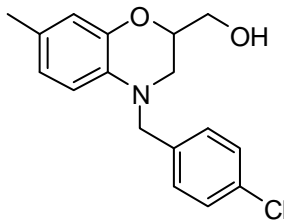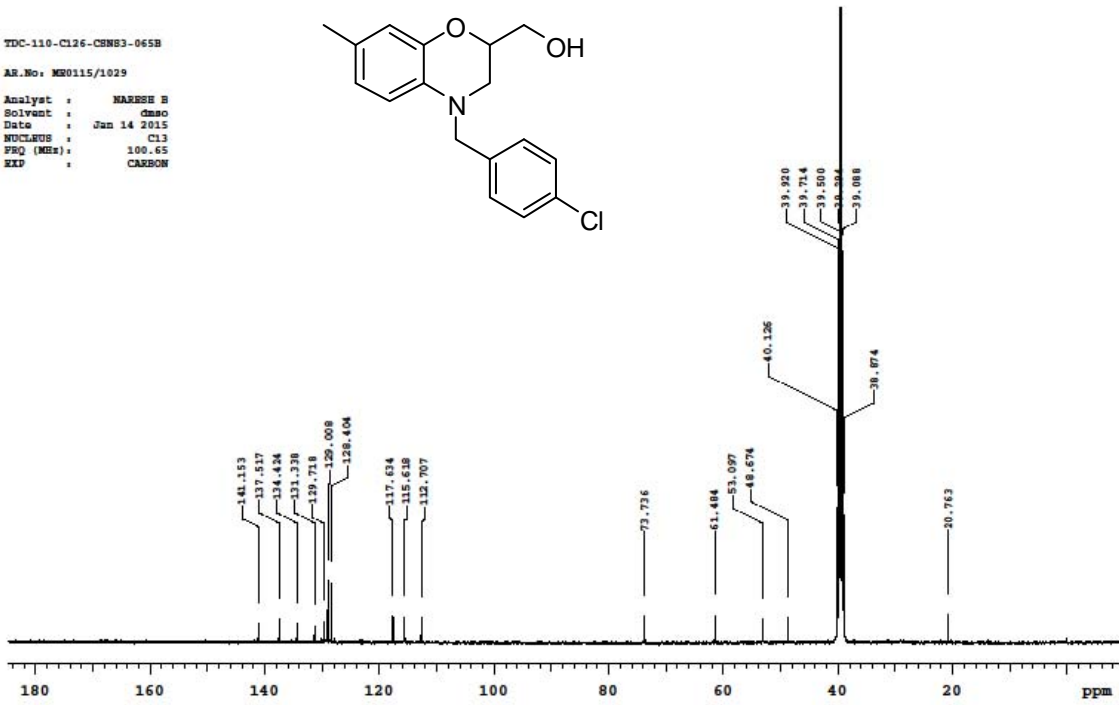

### Elemental Composition Report

#### Single Mass Analysis

Tolerance = 5.0 PPM / DBE: min = -1.5, max = 80.0

Element prediction: Off

Number of isotope peaks used for i-FIT = 4

Monoisotopic Mass, Even Electron Ions

222 formula(e) evaluated with 1 results within limits (up to 4 best isotopic matches for each mass)

Elements Used:

C: 0-21 H: 0-25 N: 0-4 O: 0-6 Cl: 0-2

C126/CSNS3/065 B

150122019 9 (0.258) Cm (9.10-36)

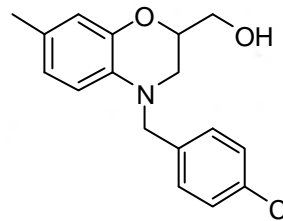

Page 1

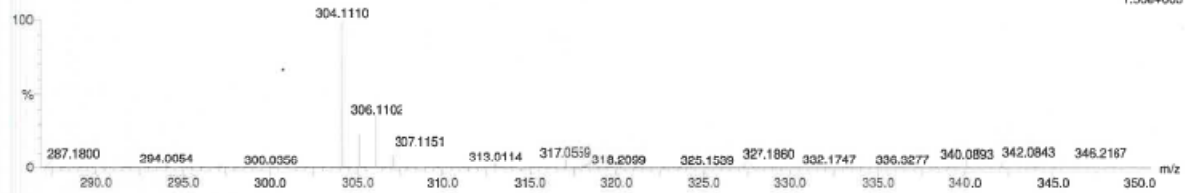

1: TOF MS ES+  
1.50e+003

| Minimum: | Maximum: | Mass     | Calc. Mass | mDa | PPM | DBE | i-FIT | Formula         |
|----------|----------|----------|------------|-----|-----|-----|-------|-----------------|
|          |          | 304.1110 | 304.1104   | 0.6 | 2.0 | 8.5 | 6.6   | C17 H19 N O2 Cl |

ARDISOOI / RNR/O 21  
R. Nagarajan  
23/01/2015

22/01/2015

TDC-110-CL26-CMS3-066\_1064

AR.No: MS0115/1064

Analyst : NARESH B  
Solvent : DMSO  
Date : Jan 16 2015  
NUCLEUS : 31  
FREQ (MHz): 400.22  
EXP : PROTON

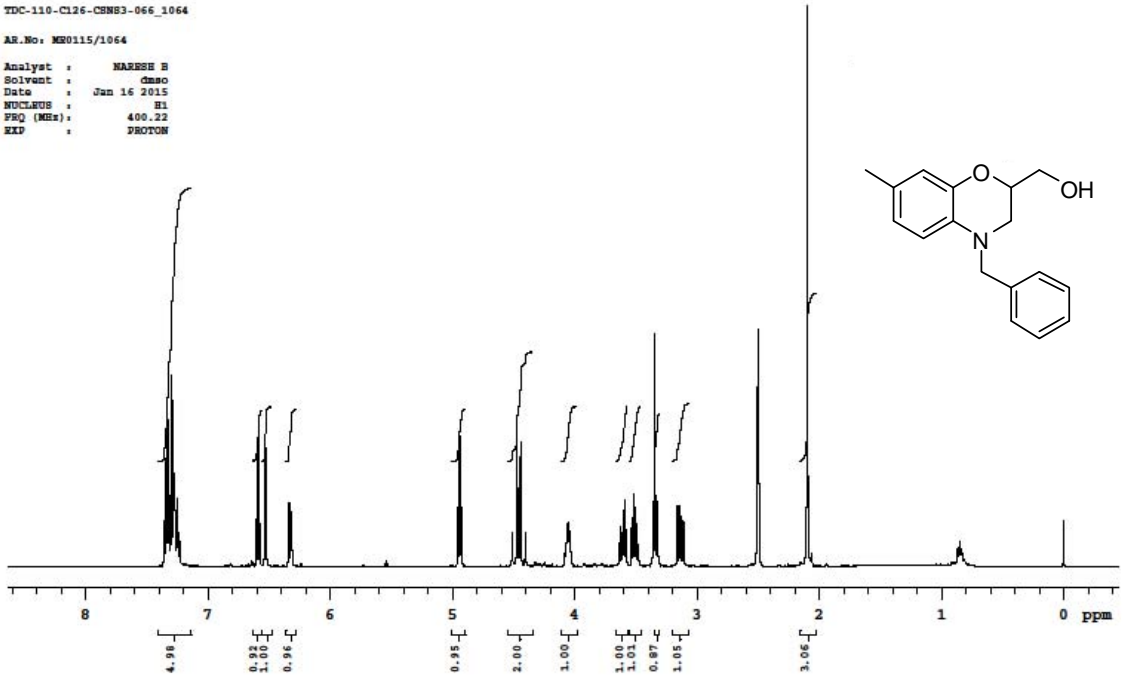



TDC-110 C126/CSNS3/066

AR.No. MW0115/2212

Analyst : MARESE B  
Solvent : DMSO  
Date : Jan 30 2015  
Wavelength : C13  
FRQ (MHz) : 100.65  
EXP : CARBON

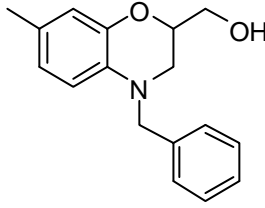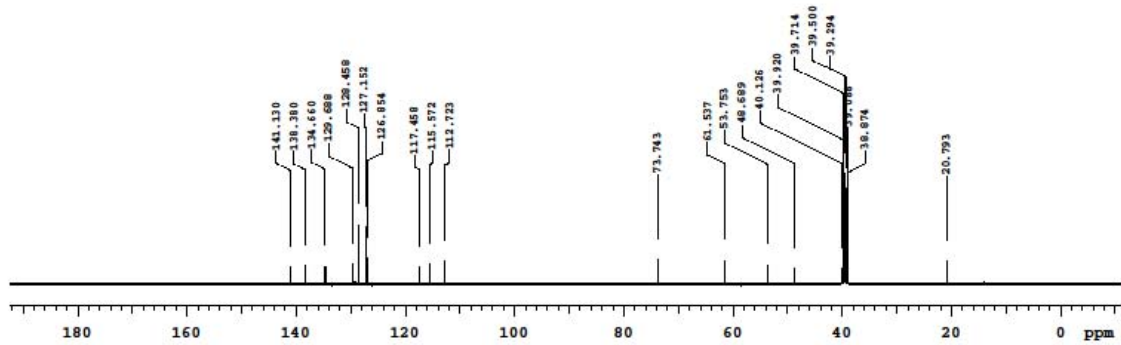

### Elemental Composition Report

#### Single Mass Analysis

Tolerance = 5.0 PPM / DBE: min = -1.5, max = 80.0  
Element prediction: Off  
Number of isotope peaks used for i-FIT = 4

Monoisotopic Mass, Even Electron Ions  
75 formula(e) evaluated with 1 results within limits (up to 4 best isotopic matches for each mass)  
Elements Used:  
C: 0-23 H: 0-25 N: 0-4 O: 0-6  
C126/CSNS3/066  
150122020 9 (0.258) Cm (9:12-46:48)

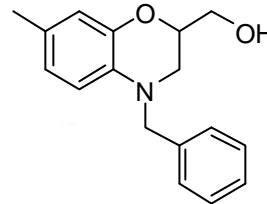

Page 1

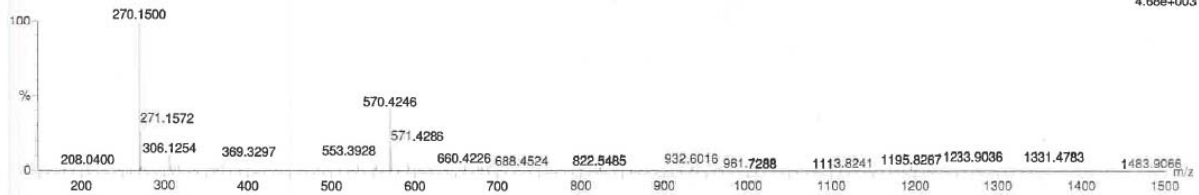

1: TOF MS ES+  
4.68e+003

| Mass     | Calc. Mass | mDa | PPM | DBE | i-FIT | Formula      |
|----------|------------|-----|-----|-----|-------|--------------|
| 270.1500 | 270.1494   | 0.6 | 2.2 | 8.5 | 35.2  | C17 H20 N O2 |

ARDIS001/RNR/02

R. N. Nagarajan  
22/01/2015

22/01/2015

TDC-110-C126-C8N83-067

AR.No: MR0215/1553

Analyst : Mallikarjun  
Solvent : dmsd  
Date : Feb 16 2015  
NUCLEUS : H1  
FREQ (MHz): 400.22  
EXP : PROTON

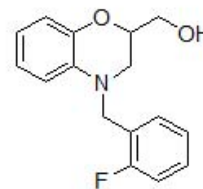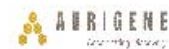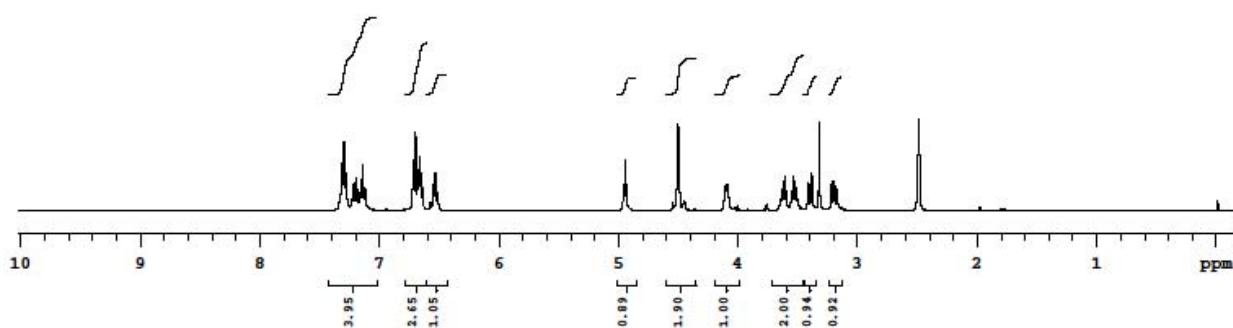

TDC-110 C126/CSNS3/067

AR.No: MR0215/1590

Analyst : NARRESE B  
Solvent : DMSO  
Date : Feb 20 2015  
NUCLEUS : C13  
FREQ (MHz): 100.65  
EXP : CARBON

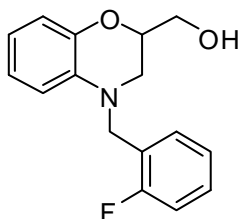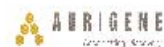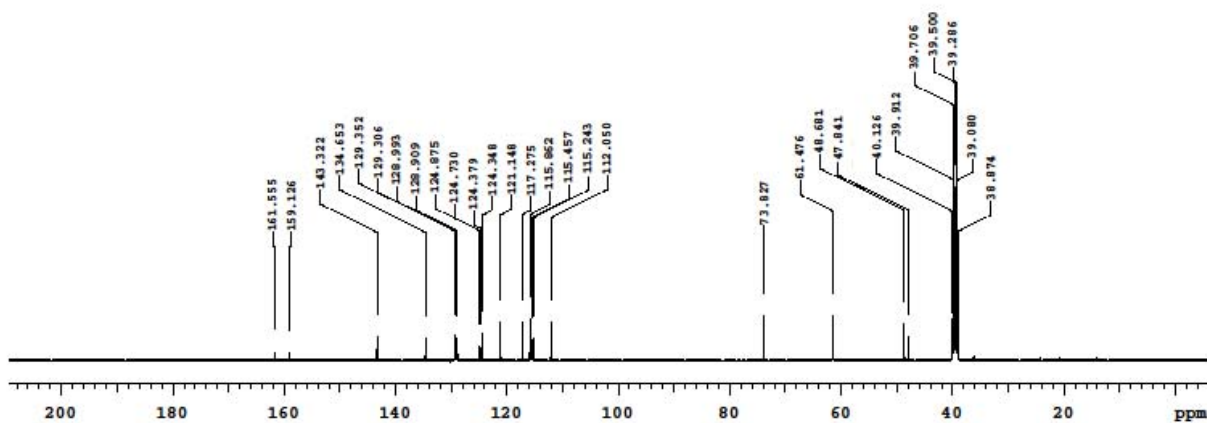

### Elemental Composition Report

#### Single Mass Analysis

Tolerance = 5.0 PPM / DBE: min = -1.5, max = 80.0

Element prediction: Off

Number of isotope peaks used for i-FIT = 4

Monoisotopic Mass, Even Electron Ions

113 formula(e) evaluated with 1 results within limits (up to 10 best isotopic matches for each mass)

Elements Used:

C: 0-18 H: 0-25 N: 0-3 O: 0-3 F: 0-1 I: 0-1

C126/CSNS3/067

1502200C3 7 (0.192) Cm (6.8)

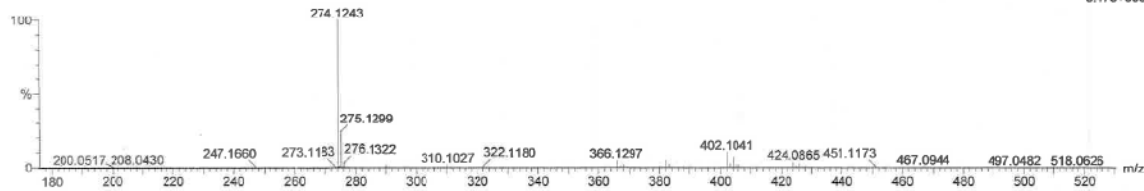

Minimum:

Maximum: 5.0 5.0 -1.5

| Mass     | Calc. Mass | mDa | PPM | DBE | i-FIT  | Formula        |
|----------|------------|-----|-----|-----|--------|----------------|
| 274.1243 | 274.1243   | 0.0 | 0.0 | 8.5 | 2241.9 | C16 H17 N O2 F |

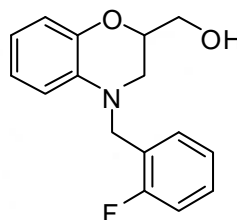

Page 1

1: TOF MS ES+  
3.47e+005

TDC-110-Cl26-C88B3-068

AR.No: MR0215/1552

Analyst : Mallikarjun  
Solvent : DMSO  
Date : Feb 16 2015  
NUCLEUS : <sup>1</sup>H  
FRQ (MHz): 400.22  
EXP : PROTON

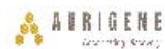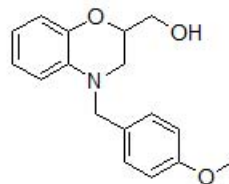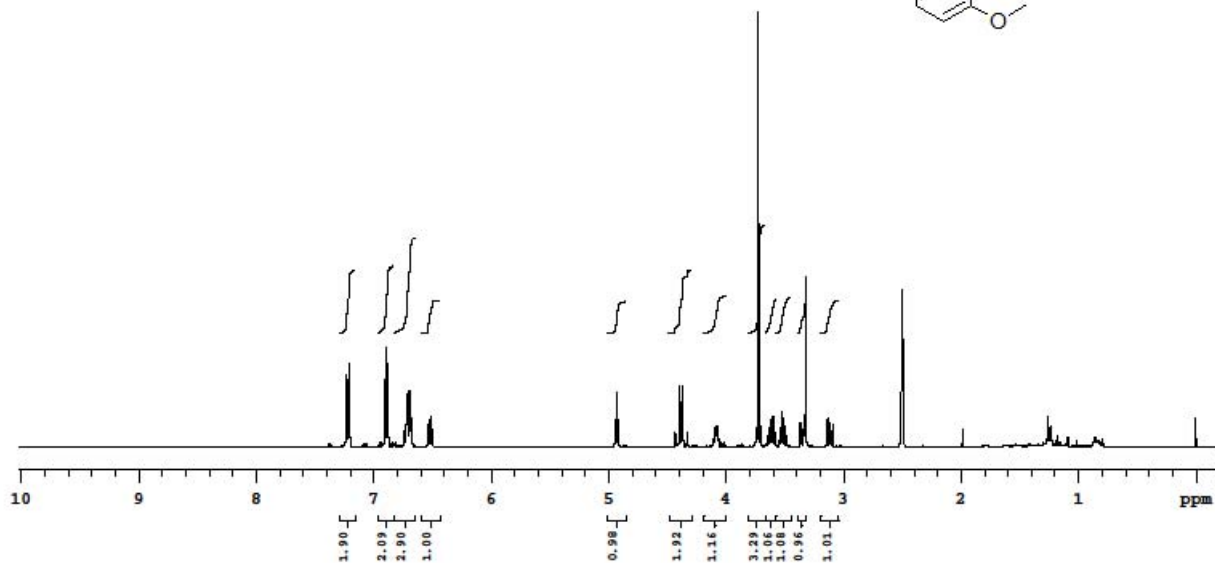

TDC-110 C126/C8NS3/068P

AR.No: ME2015/2430

Analyst : NARESH B  
Solvent : dmsd  
Date : Feb 25 2015  
NUCLEUS : C13  
FREQ (MHz): 100.65  
EXP : CARBON

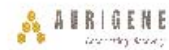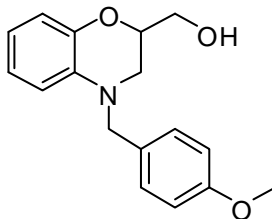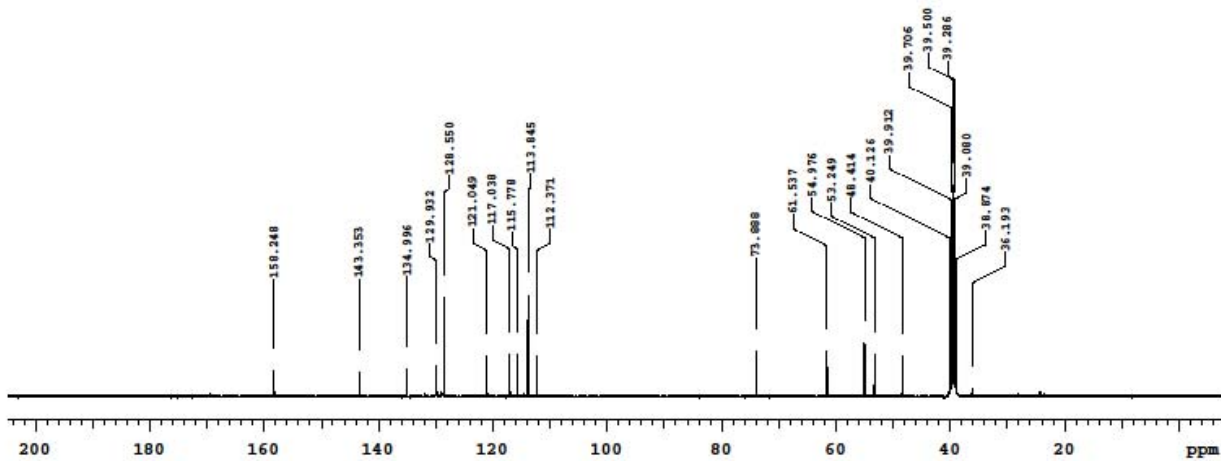

**Elemental Composition Report**

**Single Mass Analysis**

Tolerance = 5.0 PPM / DBE: min = -1.5, max = 80.0

Element prediction: Off

Number of isotope peaks used for i-FIT = 4

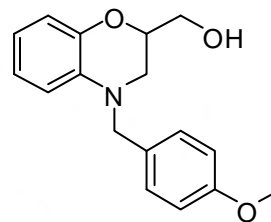

Monoisotopic Mass, Even Electron Ions

111 formula(e) evaluated with 1 results within limits (up to 10 best isotopic matches for each mass)

Elements Used:

C: 0-18 H: 0-25 N: 0-3 O: 0-3 F: 0-1 I: 0-1

C126/GSNS3/068

150220004 8 (0.212) Cm (8-57:60)

1: TOF MS ES+  
2.48e+004

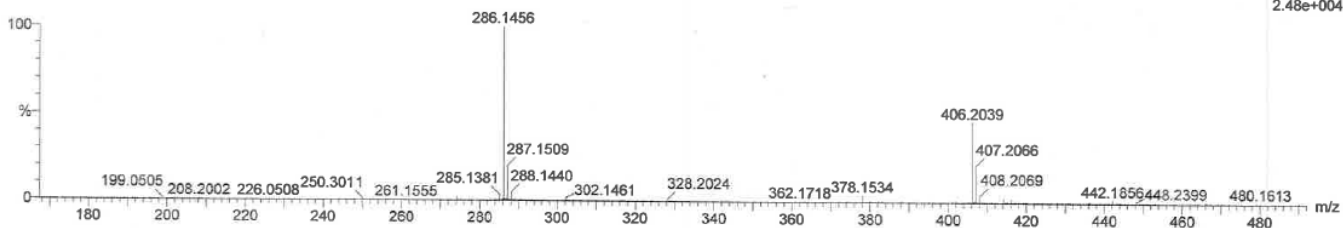

Minimum: -1.5  
Maximum: 5.0 5.0 80.0

| Mass     | Calc. Mass | mDa | PPM | DBE | i-FIT | Formula      |
|----------|------------|-----|-----|-----|-------|--------------|
| 286.1456 | 286.1443   | 1.3 | 4.5 | 8.5 | 187.9 | C17 H20 N O3 |

**Fig. S-1.** The results of HMBC study for *compound 3a*

026/0583/030 in DMSO  
CPS  
EDC-110  
MR No: IN0115/128  
Date: 20th Jan 2015  
Analyst: Mallikarjun

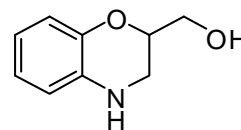

NUCLEUS : H1  
PULP (MHz): 499.63  
EXP : gHMBC

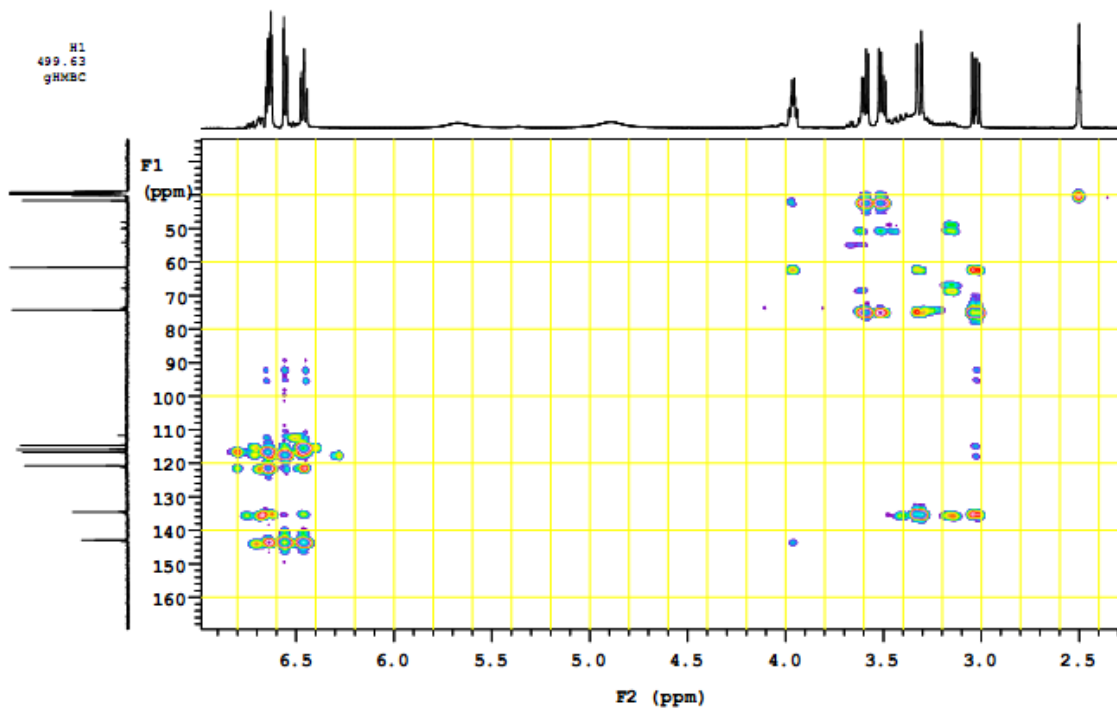

CL26/C8N83/030 in DMSO  
CPS  
EUC-110  
RR No: IN0115/128  
Date: 20th Jan 2015  
Analyst: Mallikarjun

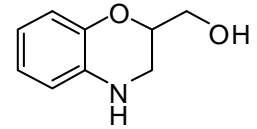

NUCLEUS : H1  
PULP (MHz): 499.63  
EXP : gHMBC

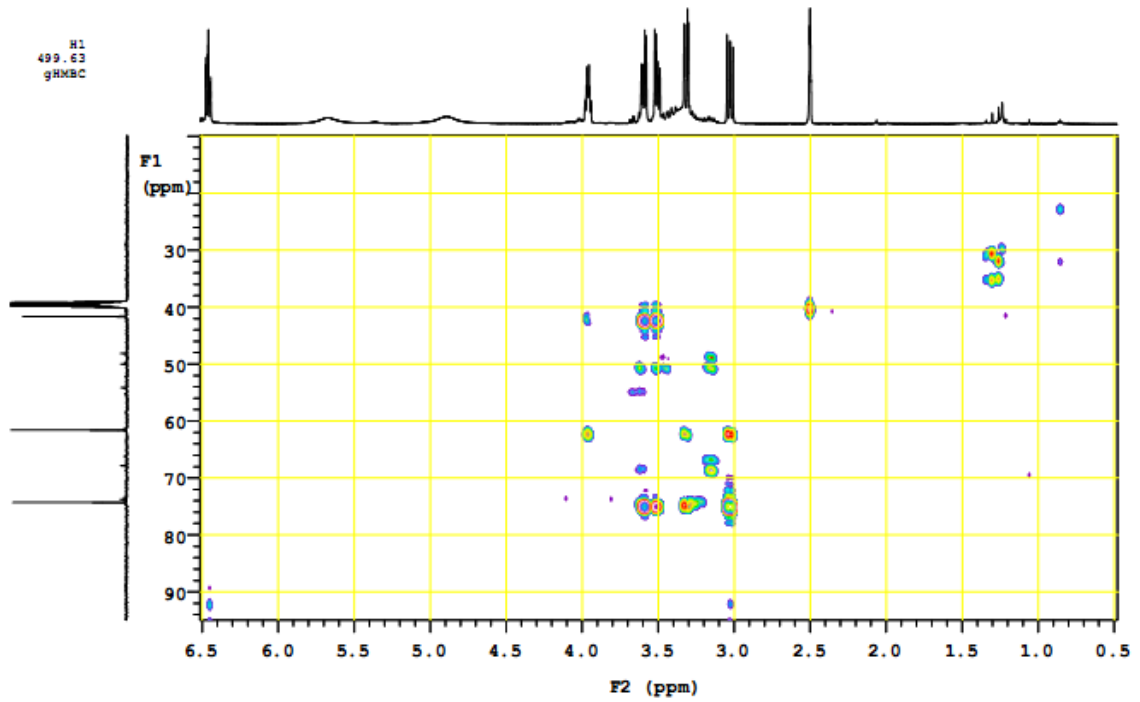

CL26/C8N83/030 in DMSO  
CPS  
EUC-110  
RR No: IN0115/128  
Date: 20th Jan 2015  
Analyst: Mallikarjun

NUCLEUS : H1  
PULP (MHz): 499.63  
EXP : gHMBC

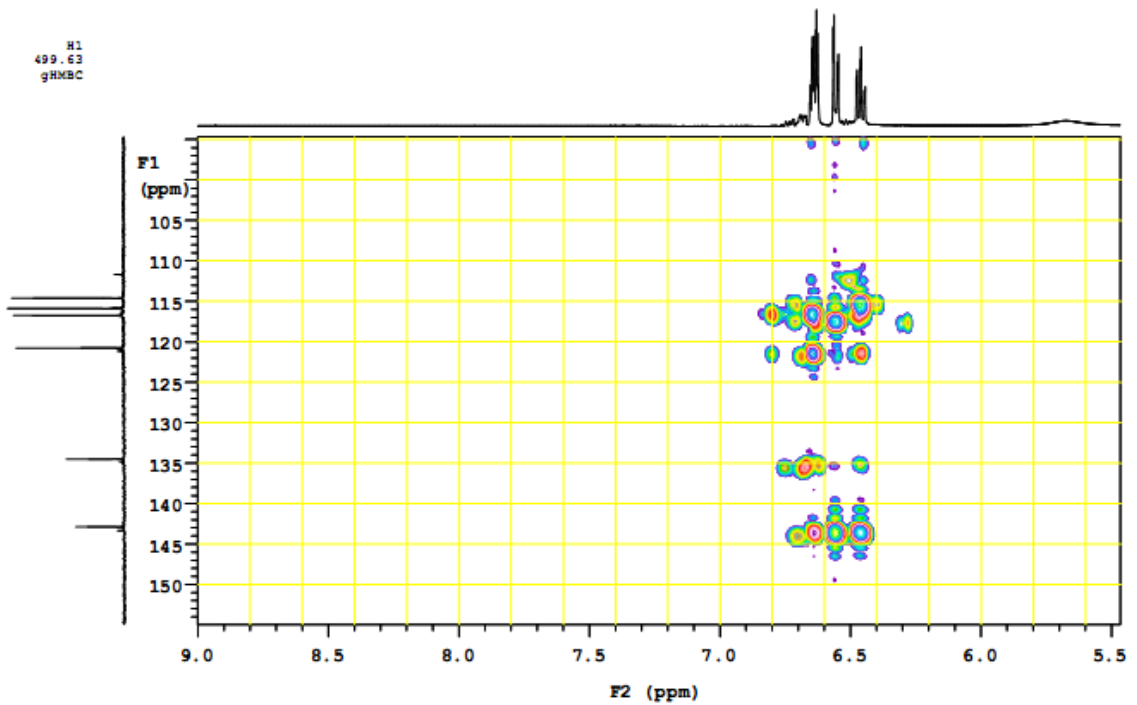



CL26/CSN83/030 in DMSO  
CP8  
EUC-110

MR No: IN0115/128  
Date: 20th Jan 2015  
Analyst: Mallikarjun

NUCLEUS : H1  
PULP (MHz) : 499.63  
EXP : gHMBC

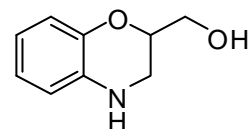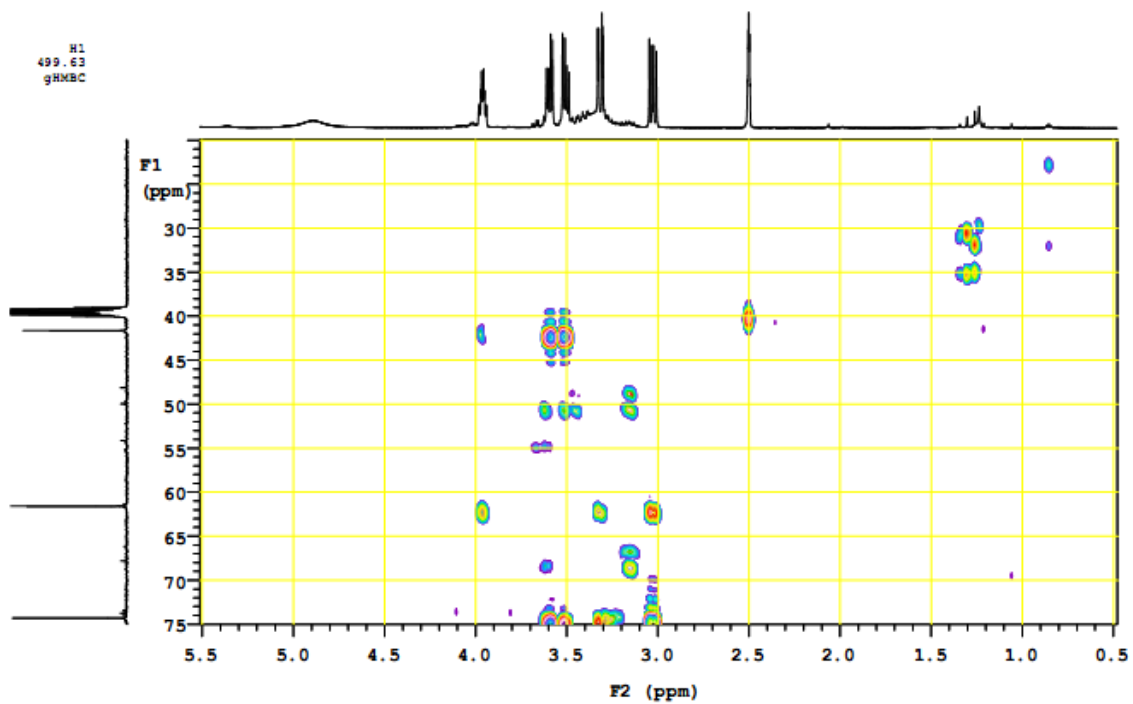

Supplement: c5ra14478g2.pdf [file c5ra14478g2.pdf]
